# Supplementary material
Source: PubMed Central journal article supplement (PMC5949069)
Supplement: NIHMS964468-supplement-Supplemental.pdf [file NIHMS964468-supplement-Supplemental.pdf]

**Supporting Information  
For**

**Hydrothiolation of benzyl mercaptan to arylacetylene: Application to the synthesis of (E) and (Z)-isomers of ON01910.Na (Rigosertib<sup>®</sup>), a phase III clinical stage anti-cancer agent<sup>†</sup>**

**Venkat R. Pallela,<sup>b§</sup> Muralidhar R. Mallireddigari,<sup>b§</sup> Stephen C. Cosenza,<sup>a</sup> Balaiah Akula,<sup>b</sup> D.R.C. Venkata Subbaiah,<sup>a</sup> E. Premkumar Reddy<sup>a</sup> and M. V. Ramana Reddy<sup>\*a</sup>**

*<sup>a</sup>Department of Oncological Sciences, Mount Sinai School of Medicine, Icahn Medical Institute, 1425 Madison Ave., New York, NY 10029-6514, USA*

**List of Contents**

<sup>1</sup>H and <sup>13</sup>C NMR spectra of all compounds

S2 -26

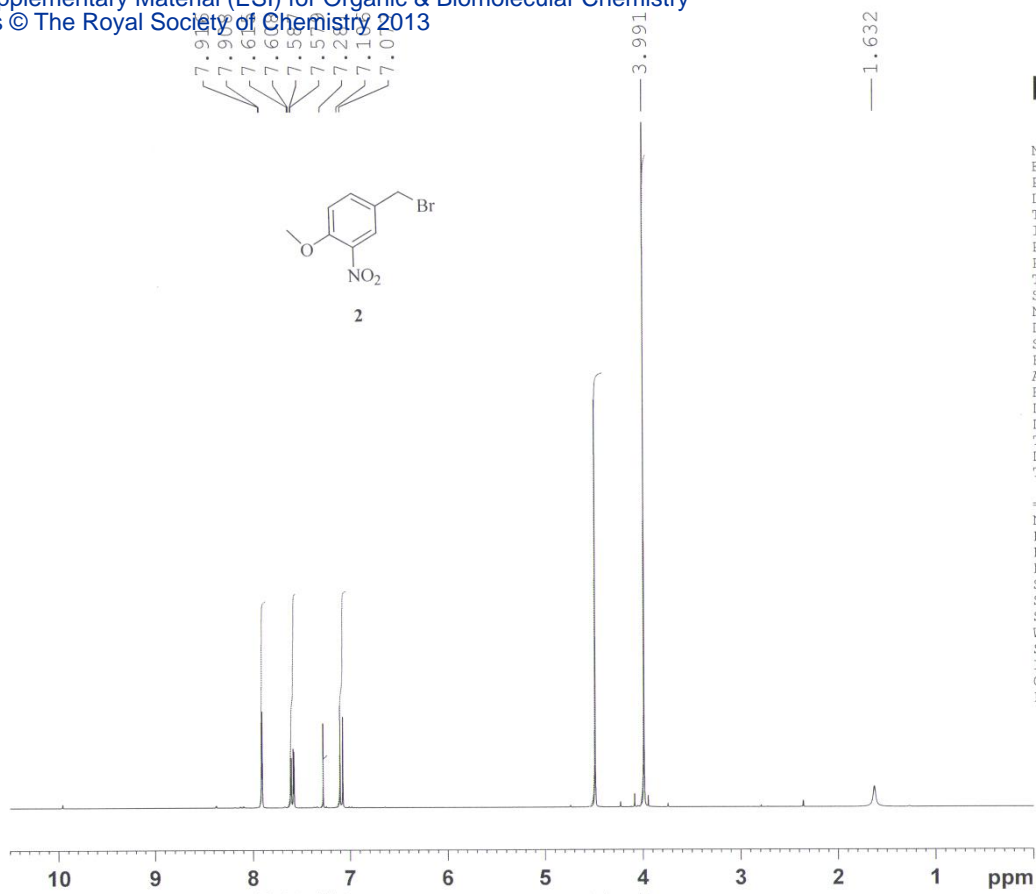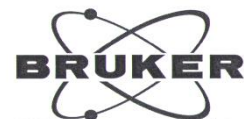

NAME venkat  
 EXPNO 1310  
 PROCNO 1  
 Date\_ 20120807  
 Time\_ 10.26  
 INSTRUM spect  
 PROBHD 5 mm PABBO BB-  
 PULPROG zg30  
 TD 65536  
 FIDRES 0.094423 Hz  
 AQ 5.2953587 sec  
 RG 228  
 DW 80.800 usec  
 DE 6.50 usec  
 TE 292.8 K  
 D1 1.00000000 sec  
 TD0 1

===== CHANNEL f1 =====  
 NUC1 1H  
 P1 11.00 usec  
 PL1 0.00 dB  
 PL1W 11.02718163 W  
 SFO1 300.1318534 MHz  
 SI 32768  
 SF 300.1300000 MHz  
 WDW EM  
 SSB 0  
 LB 0.30 Hz  
 GB 0  
 PC 1.00

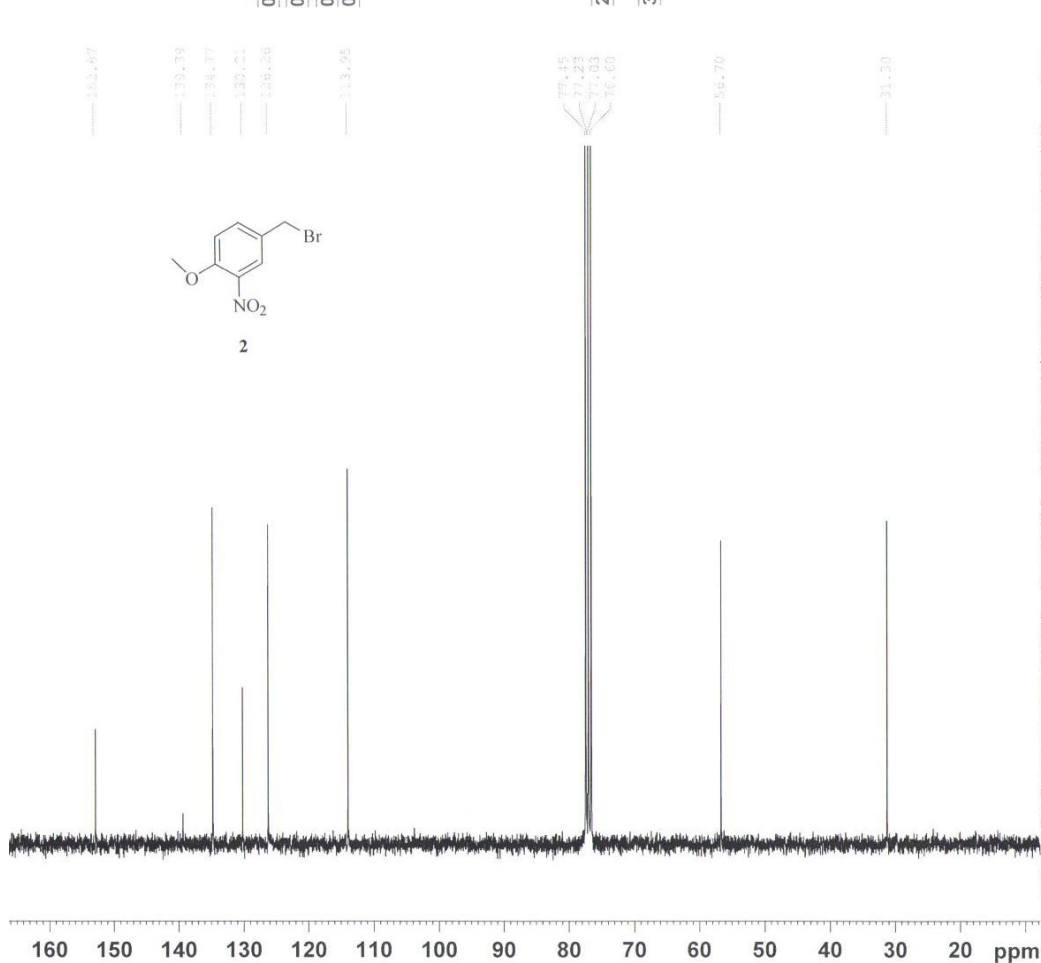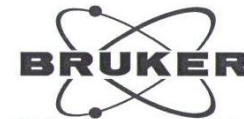

NAME venkat  
 EXPNO 1260  
 PROCNO 1  
 Date\_ 20120806  
 Time\_ 14.56  
 INSTRUM spect  
 PROBHD 5 mm PABBO BB-  
 PULPROG zgpg30  
 TD 65536  
 FIDRES 0.275098 Hz  
 AQ 1.8175818 sec  
 RG 456  
 DW 27.733 usec  
 DE 6.50 usec  
 TE 293.2 K  
 D1 2.00000000 sec  
 D11 0.03000000 sec  
 TD0 1

===== CHANNEL f1 =====  
 NUC1 13C  
 P1 9.25 usec  
 PL1 0.00 dB  
 PL1W 25.82219315 W  
 SFO1 75.4752953 MHz

===== CHANNEL f2 =====  
 CPDPRG2 waltz16  
 NUC2 1H  
 PCPD2 80.00 usec  
 PL2 0.00 dB  
 PL12 17.23 dB  
 PL13 18.00 dB  
 PL2W 11.02718163 W  
 PL12W 0.20867218 W  
 PL13W 0.17476904 W  
 SFO2 300.1312005 MHz  
 SI 32768  
 SF 75.4677490 MHz  
 WDW EM  
 SSB 0  
 LB 1.00 Hz  
 GB 0  
 PC 1.40

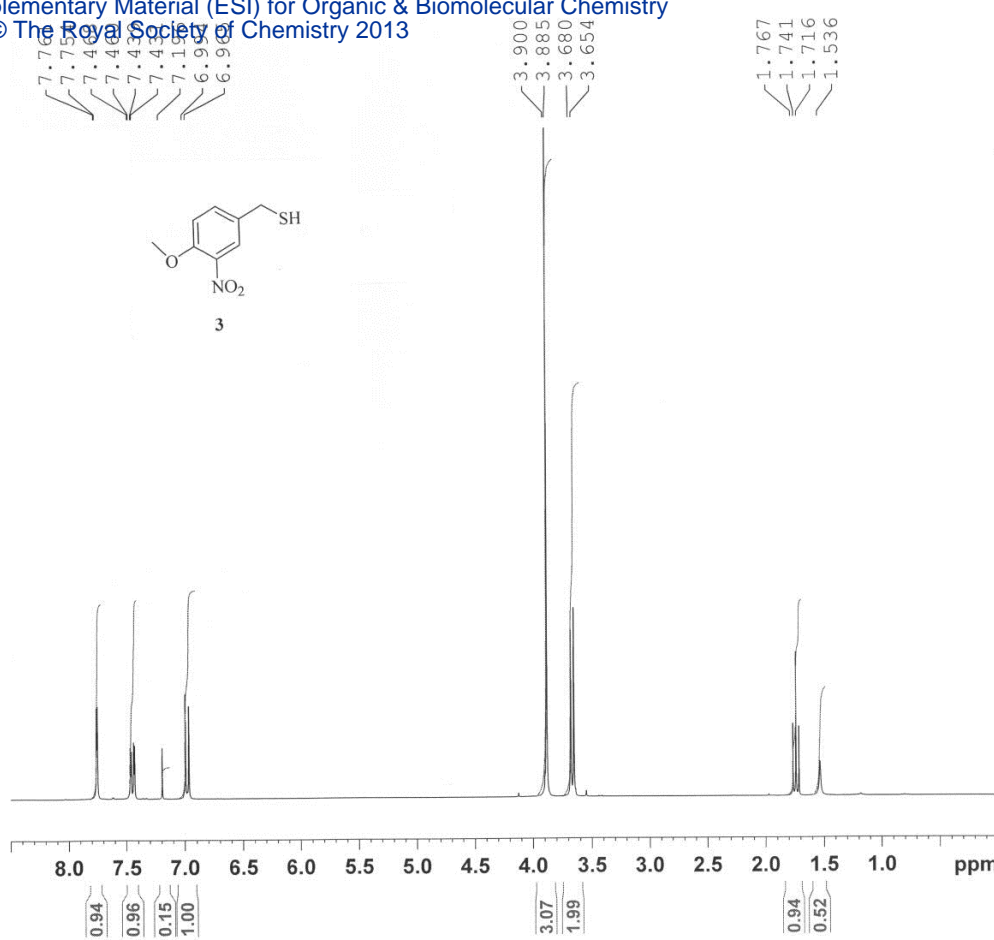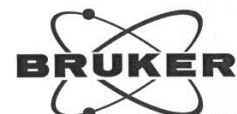

```

NAME      venkat
EXPNO     1280
PROCNO    1
Date_     20120806
Time_     16.36
INSTRUM   spect
PROBHD    5 mm PABBO BB-
PULPROG   zg30
TD         65536
SOLVENT   CDCl3
NS         16
DS         2
SWH        6188.119 Hz
FIDRES     0.094423 Hz
AQ         5.2953587 sec
RG         181
DW         80.800 usec
DE         6.50 usec
TE         291.7 K
D1         1.00000000 sec
D11        1
TD0        1
    
```

```

===== CHANNEL f1 =====
NUC1      1H
P1        11.00 usec
PL1       0.00 dB
PL1W      11.02718163 W
SFO1      300.1318534 MHz
SI        32768
SF        300.1300257 MHz
WDW       EM
SSB       0
LB        0.30 Hz
GB        0
PC        1.00
    
```

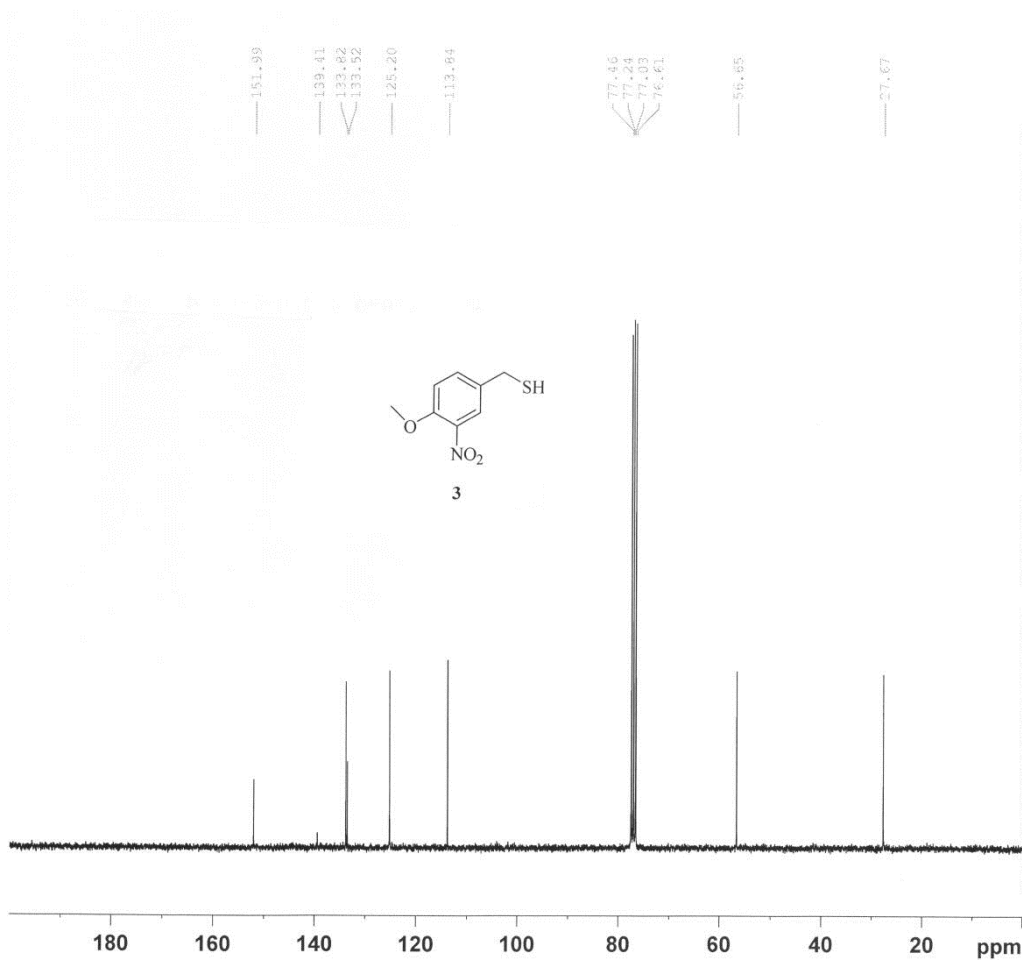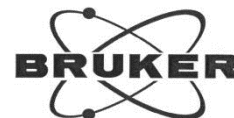

```

NAME      venkat
EXPNO     1290
PROCNO    1
Date_     20120806
Time_     17.50
INSTRUM   spect
PROBHD    5 mm PABBO BB-
PULPROG   zgpg30
TD         65536
SOLVENT   CDCl3
NS         1024
DS         4
SWH        18028.846 Hz
FIDRES     0.275098 Hz
AQ         1.8175818 sec
RG         512
DW         27.733 usec
DE         6.50 usec
TE         292.9 K
D1         2.00000000 sec
D11        0.03000000 sec
TD0        1
    
```

```

===== CHANNEL f1 =====
NUC1      13C
P1        9.25 usec
PL1       0.00 dB
PL1W      25.82219315 W
SFO1      75.4752953 MHz
    
```

```

===== CHANNEL f2 =====
CPDPRG2   waltz16
NUC2      1H
PCPD2     80.00 usec
PL2       0.00 dB
PL12      17.23 dB
PL13      18.00 dB
PL2W      11.02718163 W
PL12W     0.20867218 W
PL13W     0.17476904 W
SFO2      300.1312005 MHz
SI        32768
SF        75.4677490 MHz
WDW       EM
SSB       0
LB        1.00 Hz
GB        0
PC        1.40
    
```

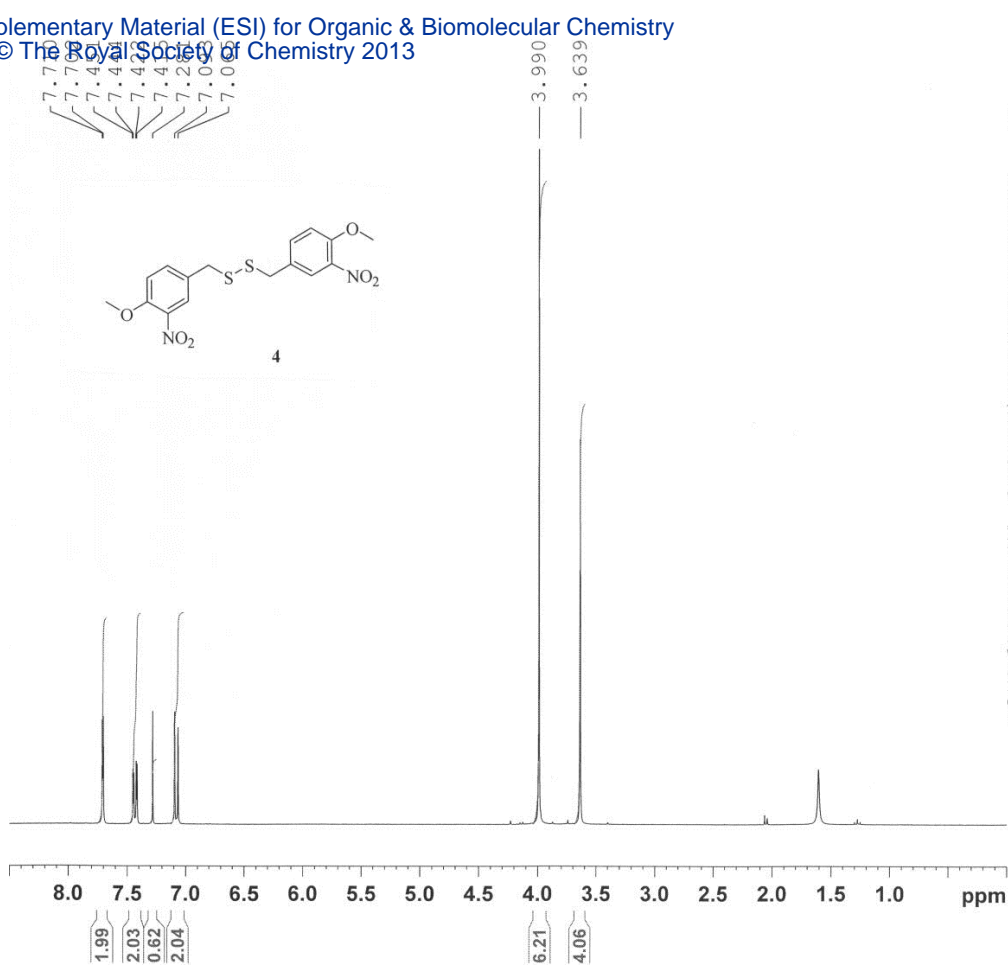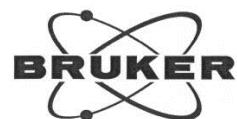

```

NAME      venkat
EXPNO     980
PROCNO    1
Date_     20120711
Time      12.21
INSTRUM   spect
PROBHD    5 mm PABBO BB-
PULPROG   zg30
TD        65536
SOLVENT   CDCl3
NS        16
DS        2
SWH       6188.119 Hz
FIDRES    0.094423 Hz
AQ        5.2953587 sec
RG        256
DW        80.800 usec
DE        6.50 usec
TE        293.1 K
D1        1.00000000 sec
TD0       1
    
```

```

===== CHANNEL f1 =====
NUC1      1H
P1        11.00 usec
PL1       0.00 dB
PL1W      11.02718163 W
SFO1      300.1318534 MHz
SI        32768
SF        300.1300000 MHz
WDW       EM
SSB       0
LB        0.30 Hz
GB        0
PC        1.00
    
```

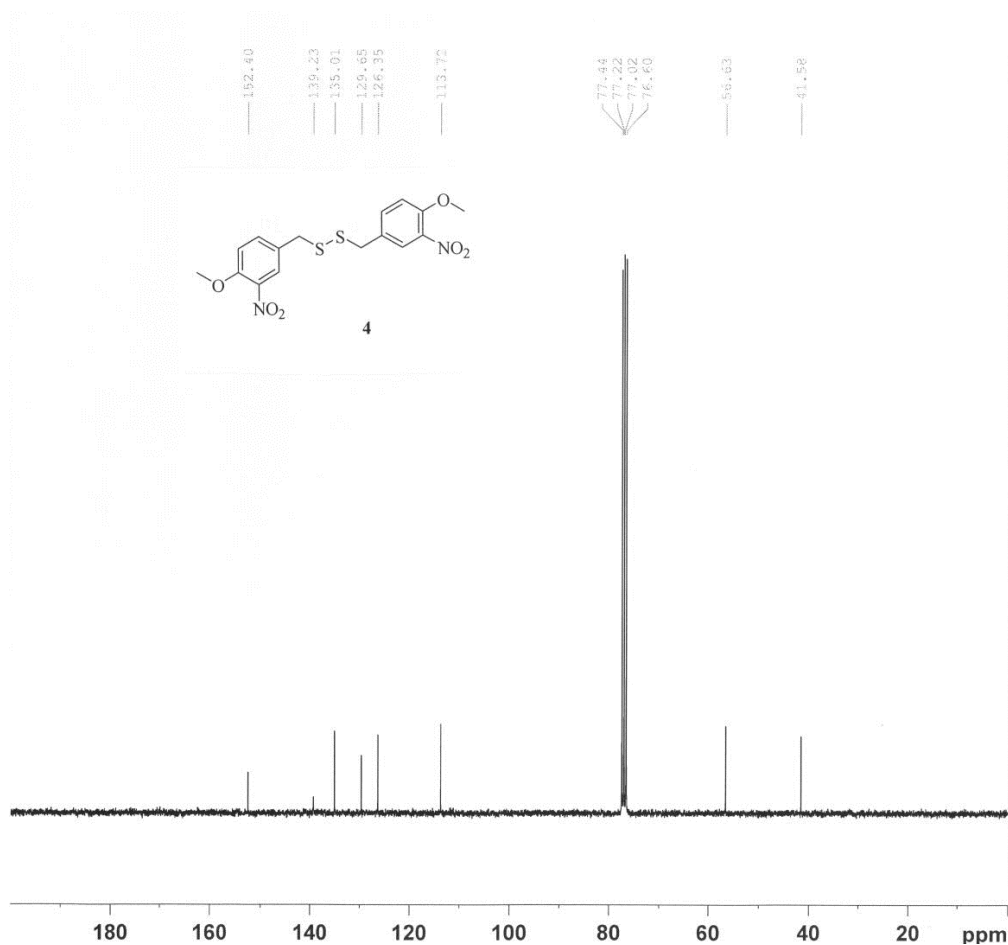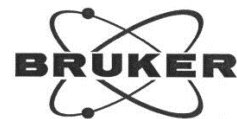

```

NAME      venkat
EXPNO     1000
PROCNO    1
Date_     20120711
Time      18.17
INSTRUM   spect
PROBHD    5 mm PABBO BB-
PULPROG   zgpg30
TD        65536
SOLVENT   CDCl3
NS        1024
DS        4
SWH       18028.846 Hz
FIDRES    0.275098 Hz
AQ        1.8175818 sec
RG        512
DW        27.733 usec
DE        6.50 usec
TE        293.2 K
D1        2.00000000 sec
D11       0.03000000 sec
TD0       1
    
```

```

===== CHANNEL f1 =====
NUC1      13C
P1        9.25 usec
PL1       0.00 dB
PL1W      25.82219315 W
SFO1      75.4752953 MHz
    
```

```

===== CHANNEL f2 =====
CPDPRG2   waltz16
NUC2      1H
PCPD2     80.00 usec
PL2       0.00 dB
PL12      17.23 dB
PL13      18.00 dB
PL2W      11.02718163 W
PL12W     0.20867218 W
PL13W     0.17476904 W
SFO2      300.1312005 MHz
SI        32768
SF        75.4677490 MHz
WDW       EM
SSB       0
LB        1.00 Hz
GB        0
PC        1.40
    
```

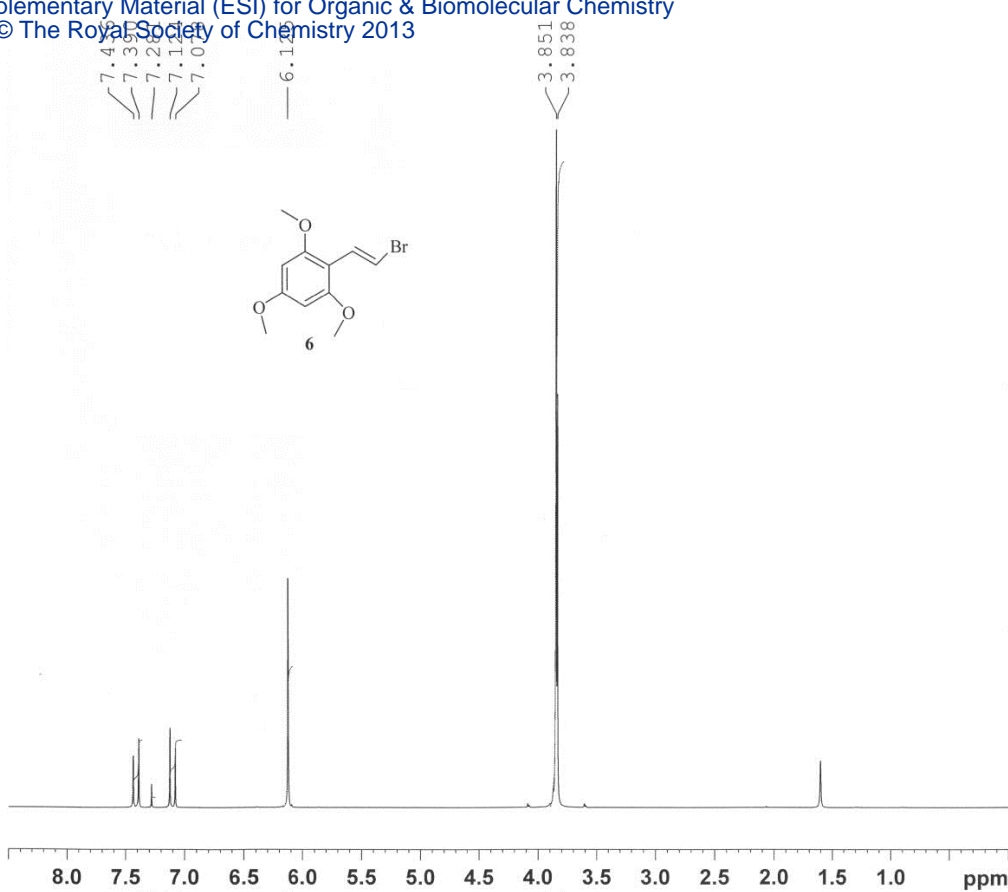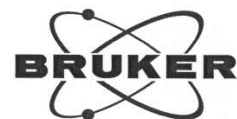

NAME venkat  
 EXPNO 1320  
 PROCNO 1  
 Date\_ 20120807  
 Time 10.33  
 INSTRUM spect  
 PROBHD 5 mm PABBO BB-  
 PULPROG zg30  
 TD 65536  
 SOLVENT CDCl3  
 NS 16  
 DS 2  
 SWH 6188.119 Hz  
 FIDRES 0.094423 Hz  
 AQ 5.2953587 sec  
 RG 161  
 DW 80.800 usec  
 DE 6.50 usec  
 TE 292.8 K  
 D1 1.00000000 sec  
 TD0 1

===== CHANNEL f1 =====  
 NUC1 1H  
 P1 11.00 usec  
 PL1 0.00 dB  
 PL1W 11.02718163 W  
 SFO1 300.1318534 MHz  
 SI 32768  
 SF 300.1300000 MHz  
 WDW EM  
 SSB 0  
 LB 0.30 Hz  
 GB 0  
 PC 1.00

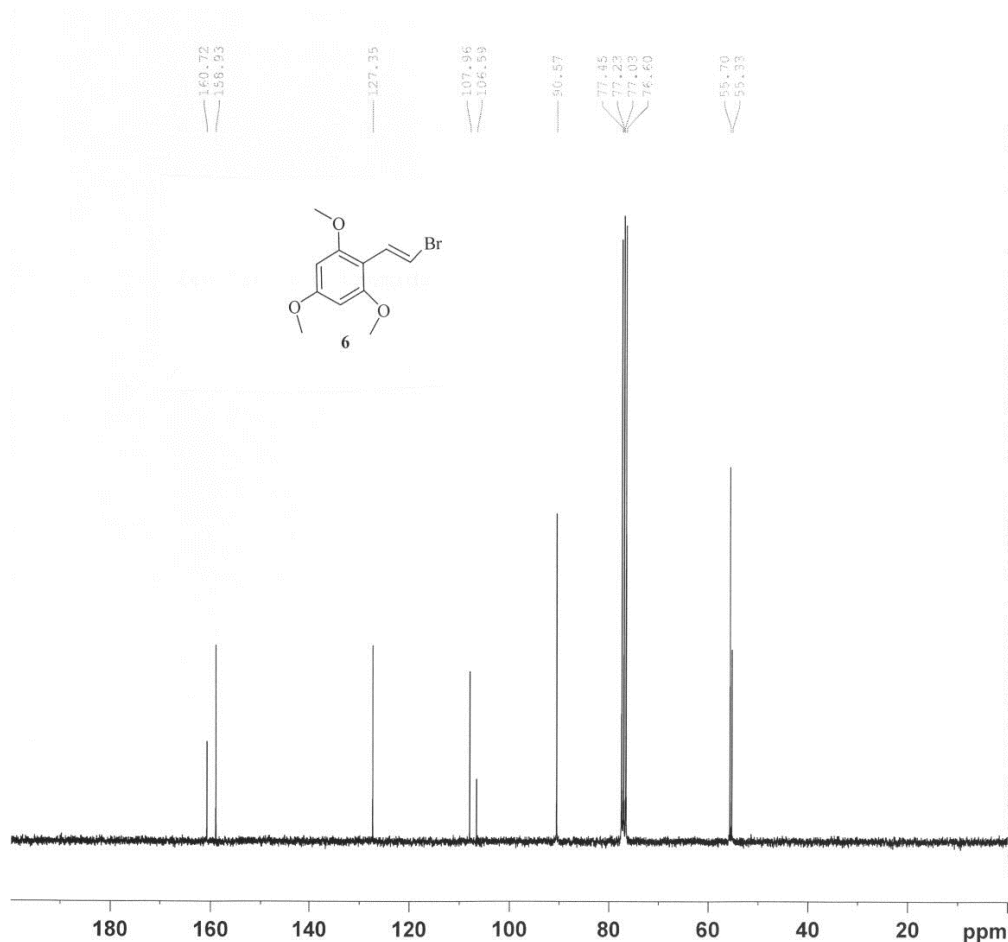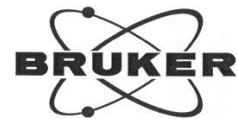

NAME venkat  
 EXPNO 1330  
 PROCNO 1  
 Date\_ 20120807  
 Time 11.43  
 INSTRUM spect  
 PROBHD 5 mm PABBO BB-  
 PULPROG zgpg30  
 TD 65536  
 SOLVENT CDCl3  
 NS 1024  
 DS 4  
 SWH 18028.846 Hz  
 FIDRES 0.275098 Hz  
 AQ 1.8175818 sec  
 RG 456  
 DW 27.733 usec  
 DE 6.50 usec  
 TE 293.1 K  
 D1 2.00000000 sec  
 D11 0.03000000 sec  
 TD0 1

===== CHANNEL f1 =====  
 NUC1 13C  
 P1 9.25 usec  
 PL1 0.00 dB  
 PL1W 25.82219315 W  
 SFO1 75.4752953 MHz

===== CHANNEL f2 =====  
 CPDPRG2 waltz16  
 NUC2 1H  
 PCPD2 80.00 usec  
 PL2 0.00 dB  
 PL12 17.23 dB  
 PL13 18.00 dB  
 PL2W 11.02718163 W  
 PL12W 0.20867218 W  
 PL13W 0.17476904 W  
 SFO2 300.1312005 MHz  
 SI 32768  
 SF 75.4677490 MHz  
 WDW EM  
 SSB 0  
 LB 1.00 Hz  
 GB 0  
 PC 1.40

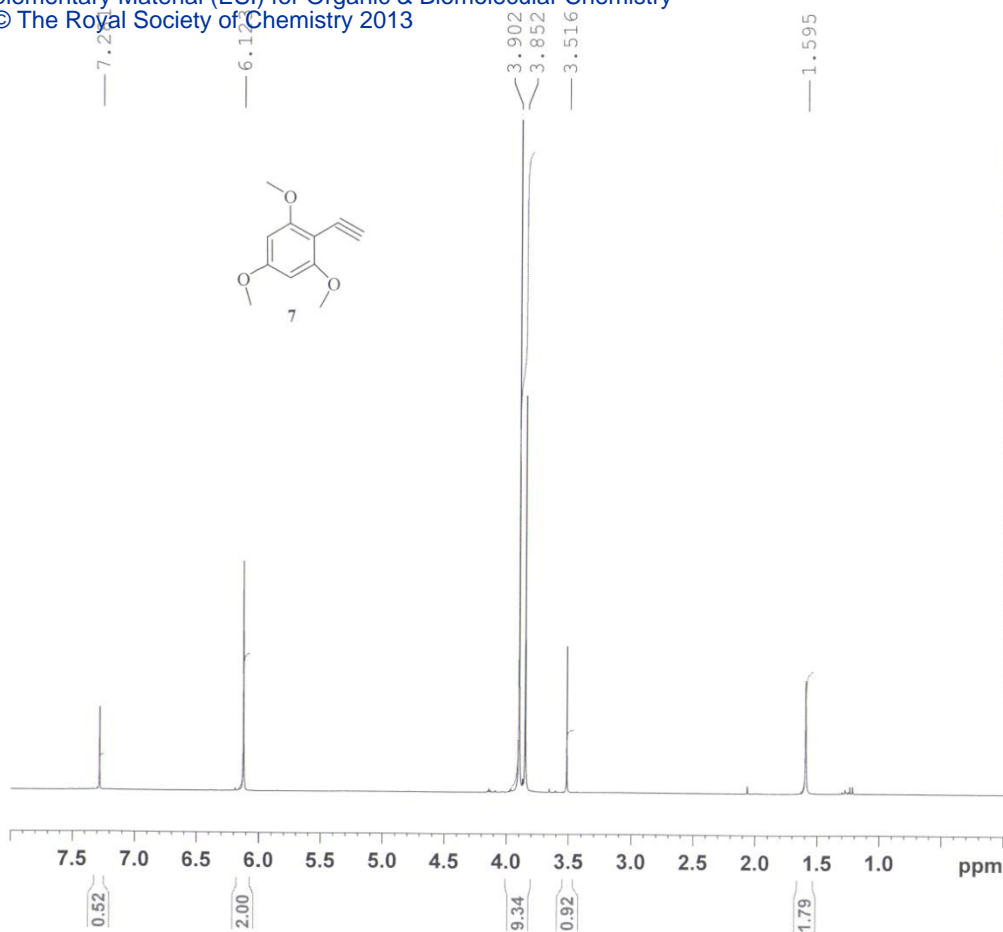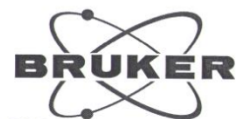

```

NAME      venkat
EXPNO     860
PROCNO    1
Date_     20120621
Time      12.40
INSTRUM   spect
PROBHD    5 mm PABBO BB-
PULPROG   zg30
TD        65536
SOLVENT   CDCl3
NS        16
DS        2
SWH       6188.119 Hz
FIDRES    0.094423 Hz
AQ        5.2953587 sec
RG        406
DW        80.800 usec
DE        6.50 usec
TE        292.2 K
D1        1.00000000 sec
D10       1
    
```

```

===== CHANNEL f1 =====
NUC1      1H
P1        11.00 usec
PL1       0.00 dB
PL1W      11.02718163 W
SFO1      300.1318534 MHz
SI        32768
SF        300.1300000 MHz
WDW       EM
SSB       0
LB        0.30 Hz
GB        0
PC        1.00
    
```

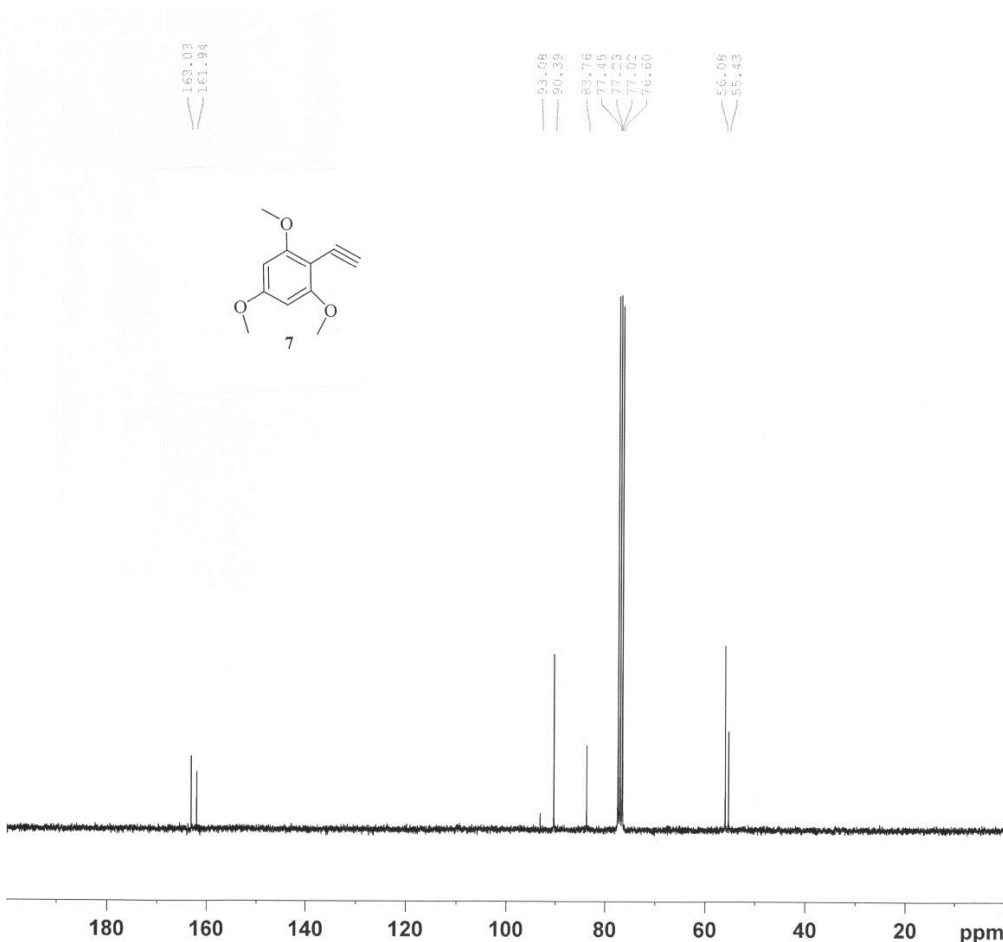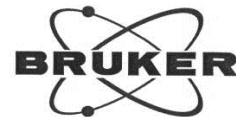

```

NAME      venkat
EXPNO     1300
PROCNO    1
Date_     20120807
Time      10.03
INSTRUM   spect
PROBHD    5 mm PABBO BB-
PULPROG   zgpg30
TD        65536
SOLVENT   CDCl3
NS        1024
DS        4
SWH       18028.846 Hz
FIDRES    0.275098 Hz
AQ        1.8175818 sec
RG        456
DW        27.733 usec
DE        6.50 usec
TE        293.4 K
D1        2.00000000 sec
D11       0.03000000 sec
D10       1
    
```

```

===== CHANNEL f1 =====
NUC1      13C
P1        9.25 usec
PL1       0.00 dB
PL1W      25.82219315 W
SFO1      75.4752953 MHz
    
```

```

===== CHANNEL f2 =====
CPDPRG2   waltz16
NUC2      1H
PCPD2     80.00 usec
PL2       0.00 dB
PL12      17.23 dB
PL13      18.00 dB
PL2W      11.02718163 W
PL12W     0.20867218 W
PL13W     0.17476904 W
SFO2      300.1312005 MHz
SI        32768
SF        75.4677490 MHz
WDW       EM
SSB       0
LB        1.00 Hz
GB        0
PC        1.40
    
```



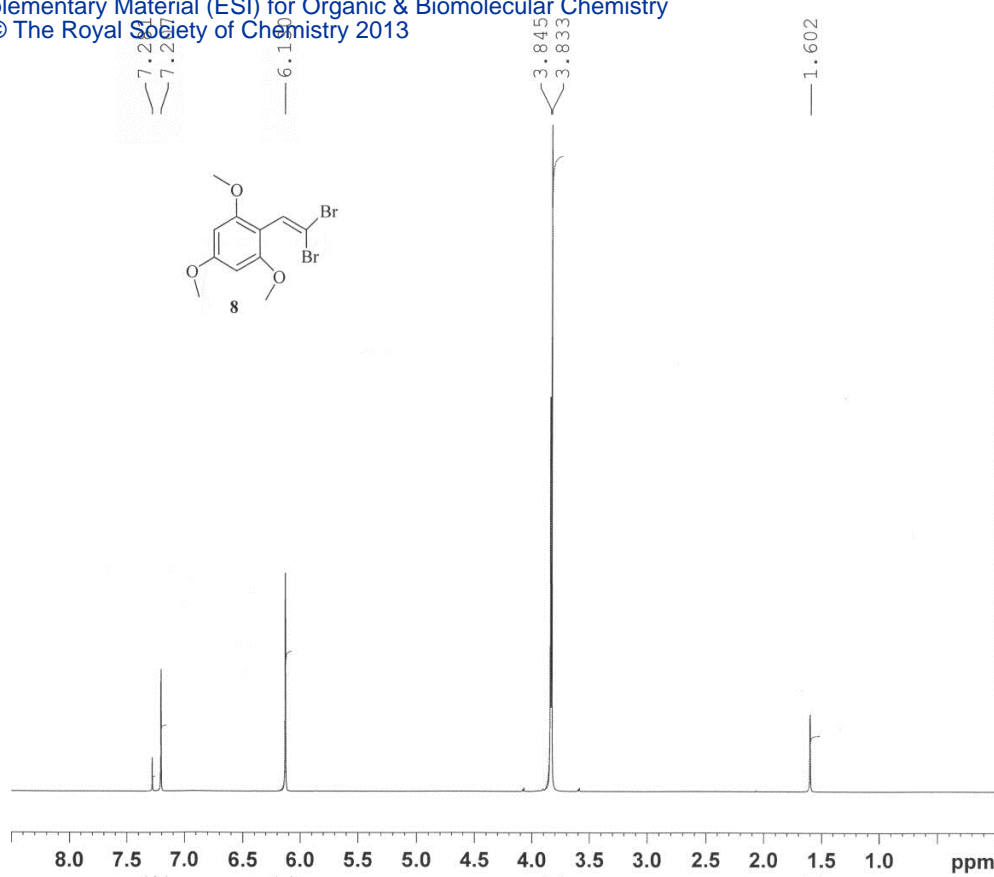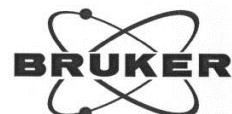

```

NAME      venkat
EXPNO    1340
PROCNO   1
Date_    20120807
Time     12.04
INSTRUM  spect
PROBHD   5 mm PABBO BB-
PULPROG  zg30
TD       65536
SOLVENT  CDCl3
NS       16
DS       2
SWH      6188.119 Hz
FIDRES   0.094423 Hz
AQ       5.2953587 sec
RG       203
DW       80.800 usec
DE       6.50 usec
TE       292.4 K
D1       1.0000000 sec
TD0      1
    
```

```

===== CHANNEL f1 =====
NUC1     1H
P1       11.00 usec
PL1      0.00 dB
PL1W     11.02718163 W
SFO1     300.1318534 MHz
SI       32768
SF       300.1300000 MHz
WDW      EM
SSB      0
LB       0.30 Hz
GB       0
PC       1.00
    
```

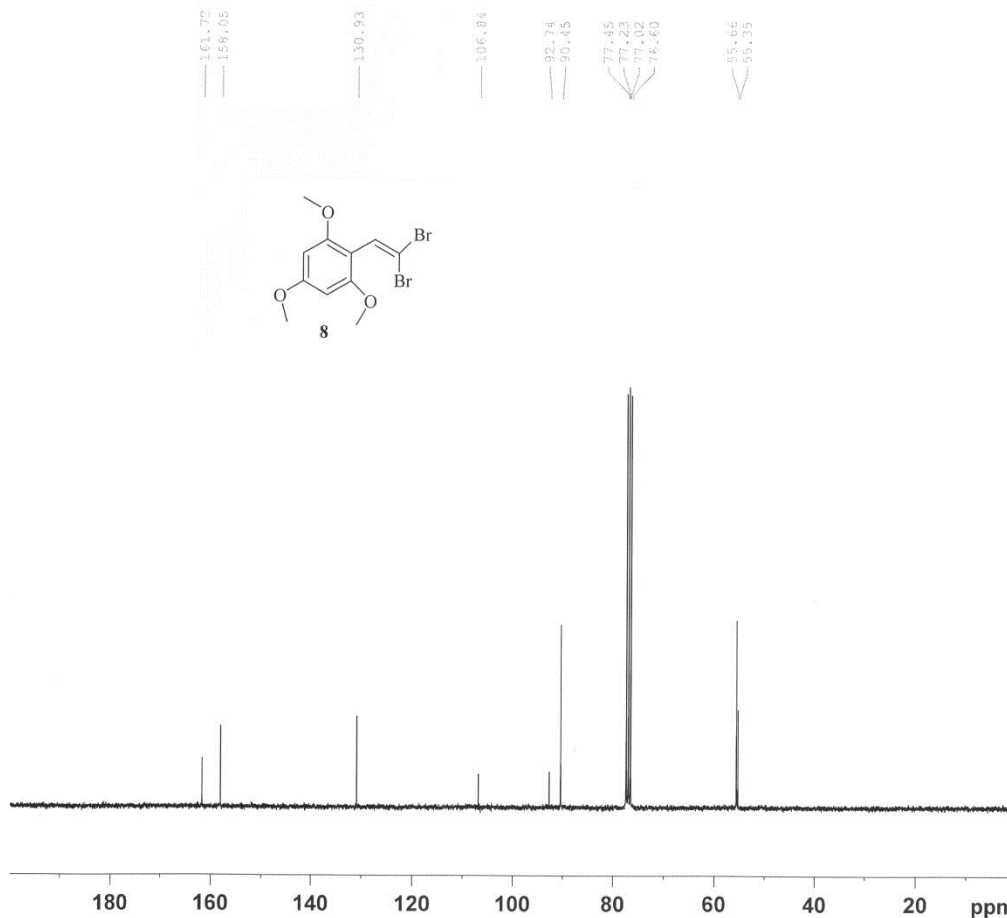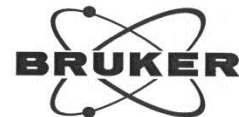

```

NAME      venkat
EXPNO    1350
PROCNO   1
Date_    20120807
Time     13.15
INSTRUM  spect
PROBHD   5 mm PABBO BB-
PULPROG  zgpg30
TD       65536
SOLVENT  CDCl3
NS       1024
DS       4
SWH      18028.846 Hz
FIDRES   0.275098 Hz
AQ       1.8175818 sec
RG       456
DW       27.733 usec
DE       6.50 usec
TE       293.4 K
D1       2.0000000 sec
D11      0.0300000 sec
TD0      1
    
```

```

===== CHANNEL f1 =====
NUC1     13C
P1       9.25 usec
PL1      0.00 dB
PL1W     25.82219315 W
SFO1     75.4752953 MHz
    
```

```

===== CHANNEL f2 =====
CPDPRG2  waltz16
NUC2     1H
PCPD2    80.00 usec
PL2      0.00 dB
PL12     17.23 dB
PL13     18.00 dB
PL2W     11.02718163 W
PL12W    0.20867218 W
PL13W    0.17476904 W
SFO2     300.1312005 MHz
SI       32768
SF       75.4677490 MHz
WDW      EM
SSB      0
LB       1.00 Hz
GB       0
PC       1.40
    
```

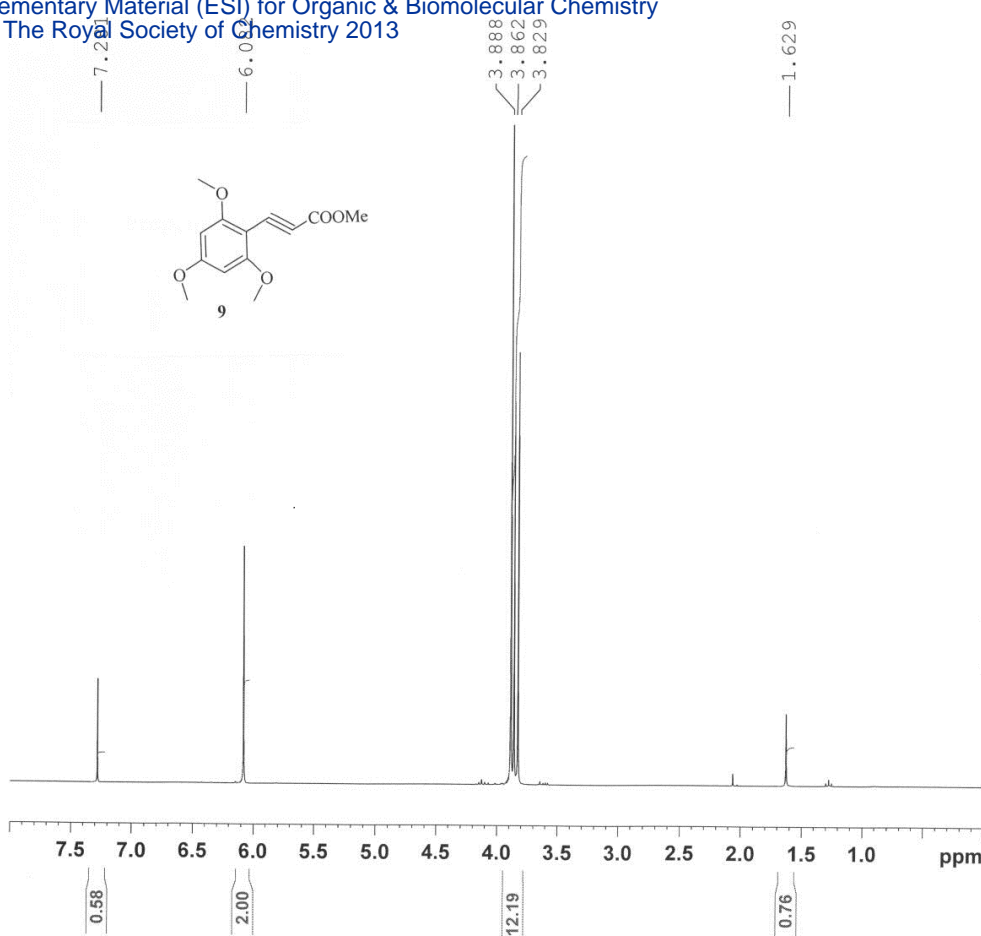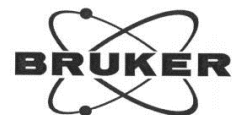

NAME murali  
 EXPNO 2890  
 PROCNO 1  
 Date\_ 20110627  
 Time\_ 16.24  
 INSTRUM spect  
 PROBHD 5 mm PABBO BB-  
 PULPROG zg30  
 TD 65536  
 SOLVENT CDCl3  
 NS 16  
 DS 2  
 SWH 6188.119 Hz  
 FIDRES 0.094423 Hz  
 AQ 5.2953587 sec  
 RG 256  
 DW 80.800 usec  
 DE 6.50 usec  
 TE 290.9 K  
 D1 1.00000000 sec  
 TD0 1

===== CHANNEL f1 =====  
 NUC1 1H  
 P1 11.00 usec  
 PL1 0.00 dB  
 PL1W 11.02718163 W  
 SFO1 300.1318534 MHz  
 SI 32768  
 SF 300.1300000 MHz  
 WDW EM  
 SSB 0  
 LB 0.30 Hz  
 GB 0  
 PC 1.00

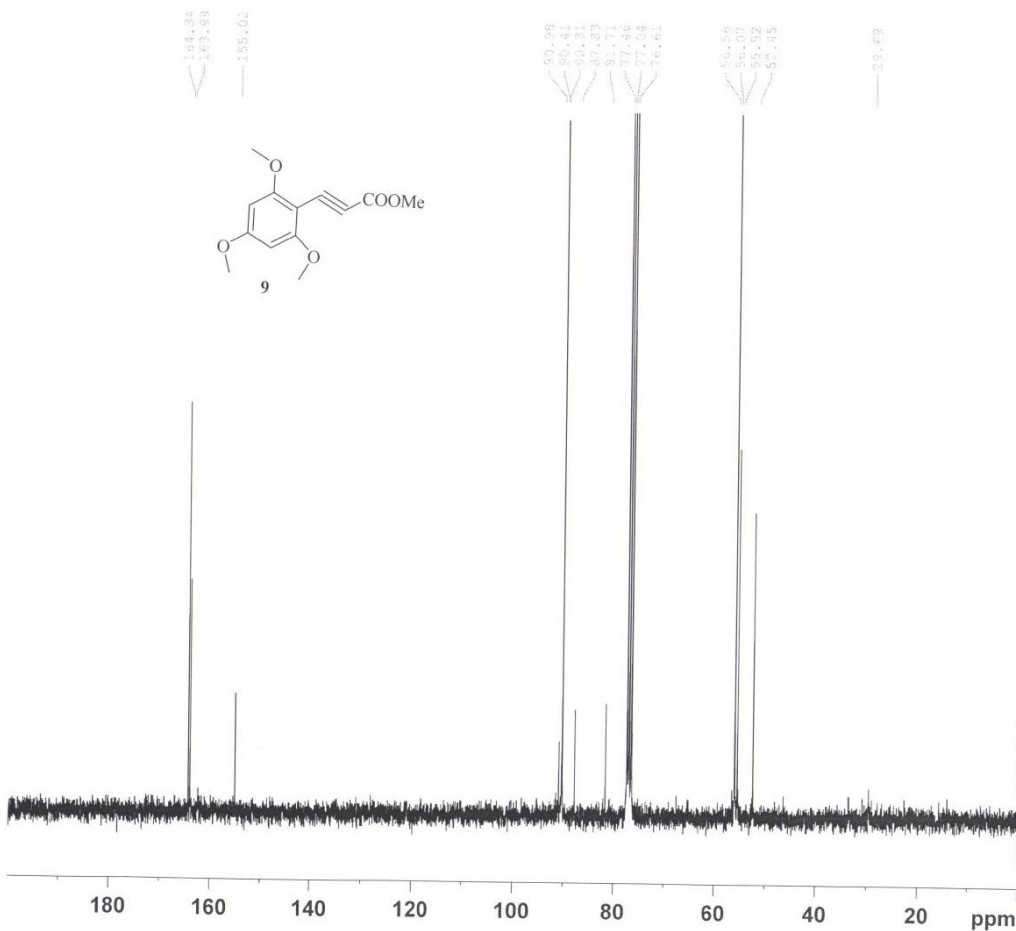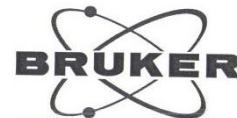

NAME murali  
 EXPNO 6040  
 PROCNO 1  
 Date\_ 20120914  
 Time\_ 14.46  
 INSTRUM spect  
 PROBHD 5 mm PABBO BB-  
 PULPROG zgpg30  
 TD 65536  
 SOLVENT CDCl3  
 NS 1024  
 DS 4  
 SWH 18028.846 Hz  
 FIDRES 0.275098 Hz  
 AQ 1.8175818 sec  
 RG 512  
 DW 27.733 usec  
 DE 6.50 usec  
 TE 293.1 K  
 D1 2.00000000 sec  
 D11 0.03000000 sec  
 TD0 1

===== CHANNEL f1 =====  
 NUC1 13C  
 P1 9.25 usec  
 PL1 0.00 dB  
 PL1W 25.82219315 W  
 SFO1 75.4752953 MHz

===== CHANNEL f2 =====  
 CPDPRG2 waltz16  
 NUC2 1H  
 PCPD2 80.00 usec  
 PL2 0.00 dB  
 PL12 17.23 dB  
 PL13 18.00 dB  
 PL2W 11.02718163 W  
 PL12W 0.20867218 W  
 PL13W 0.17476904 W  
 SFO2 300.1312005 MHz  
 SI 32768  
 SF 75.4677490 MHz  
 WDW EM  
 SSB 0  
 LB 1.00 Hz  
 GB 0  
 PC 1.40



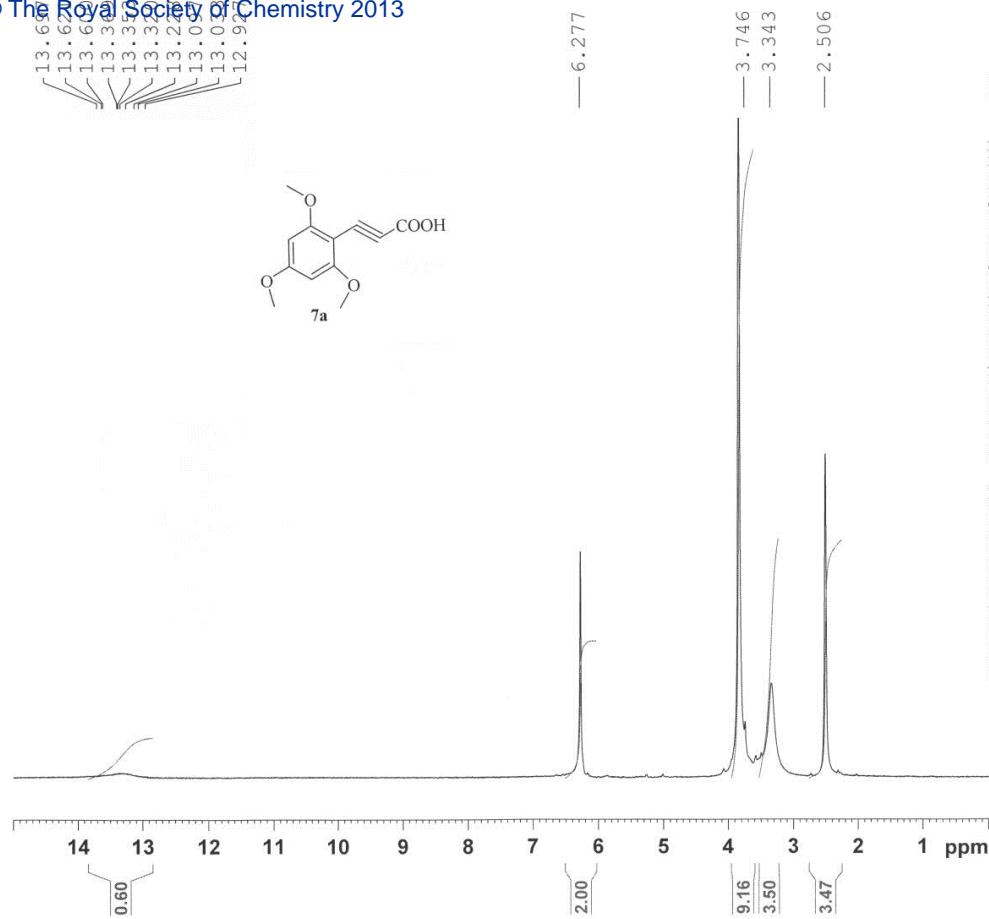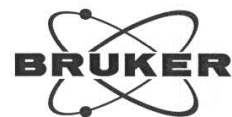

```

NAME      murali
EXPNO     2920
PROCNO    1
Date_     20110705
Time      9.30
INSTRUM   spect
PROBHD    5 mm PABBO BB-
PULPROG   zg30
TD         65536
SOLVENT   DMSO
NS         16
DS         2
SWH        6188.119 Hz
FIDRES     0.094423 Hz
AQ         5.2953587 sec
RG         406
DW         80.800 usec
DE         6.50 usec
TE         292.9 K
D1         1.00000000 sec
TD0        1
    
```

```

===== CHANNEL f1 =====
NUC1      1H
P1         11.00 usec
PL1        0.00 dB
PL1W       11.02718163 W
SFO1      300.1318534 MHz
SI         32768
SF         300.1300000 MHz
WDW        EM
SSB        0
LB         0.30 Hz
GB         0
PC         1.00
    
```

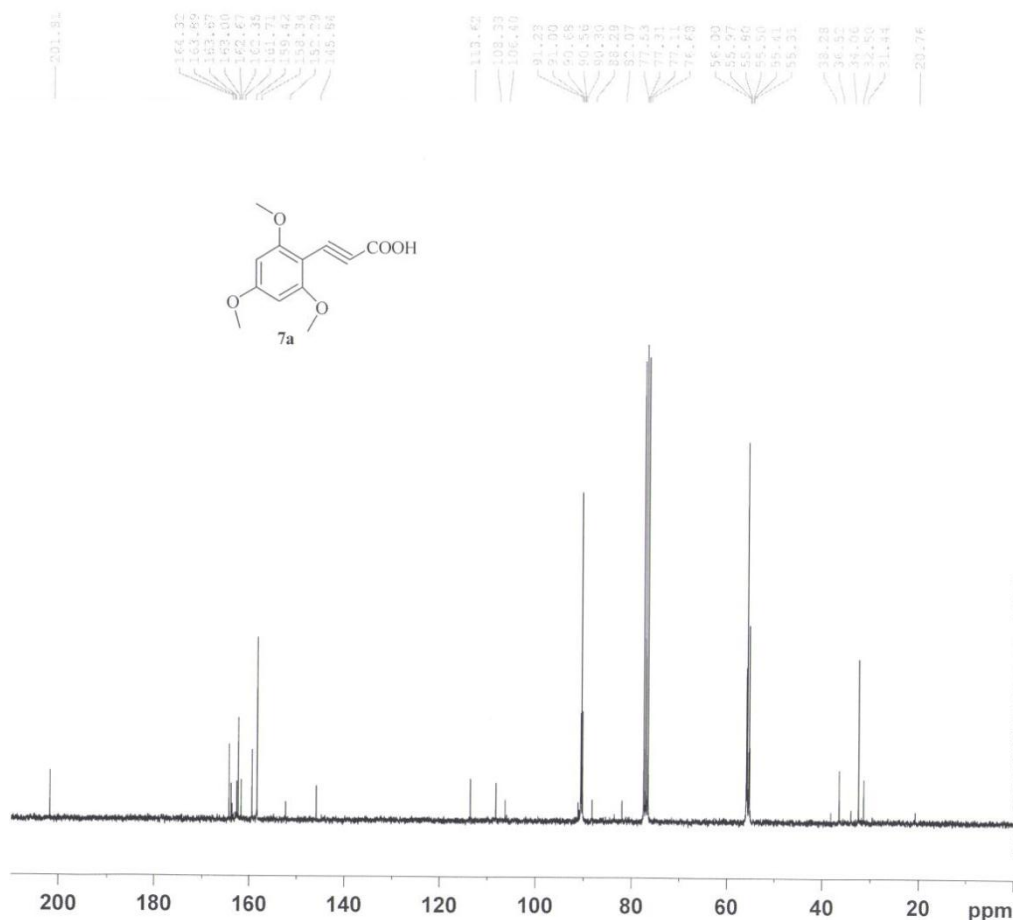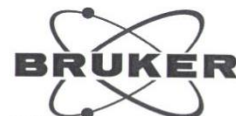

```

NAME      venkat
EXPNO     1270
PROCNO    1
Date_     20120806
Time      16.20
INSTRUM   spect
PROBHD    5 mm PABBO BB-
PULPROG   zgpg30
TD         65536
SOLVENT   CDCl3
NS         1024
DS         4
SWH        18028.846 Hz
FIDRES     0.275098 Hz
AQ         1.8175818 sec
RG         512
DW         27.733 usec
DE         6.50 usec
TE         292.5 K
D1         2.00000000 sec
D11        0.03000000 sec
TD0        1
    
```

```

===== CHANNEL f1 =====
NUC1      13C
P1         9.25 usec
PL1        0.00 dB
PL1W       25.82219315 W
SFO1      75.4752953 MHz
    
```

```

===== CHANNEL f2 =====
CPDPRG2   waltz16
NUC2      1H
PCPD2     80.00 usec
PL2        0.00 dB
PL12      17.23 dB
PL13      18.00 dB
PL2W      11.02718163 W
PL12W     0.20867218 W
PL13W     0.17476904 W
SFO2      300.1312005 MHz
SI         32768
SF         75.4677490 MHz
WDW        EM
SSB        0
LB         1.00 Hz
GB         0
PC         1.40
    
```

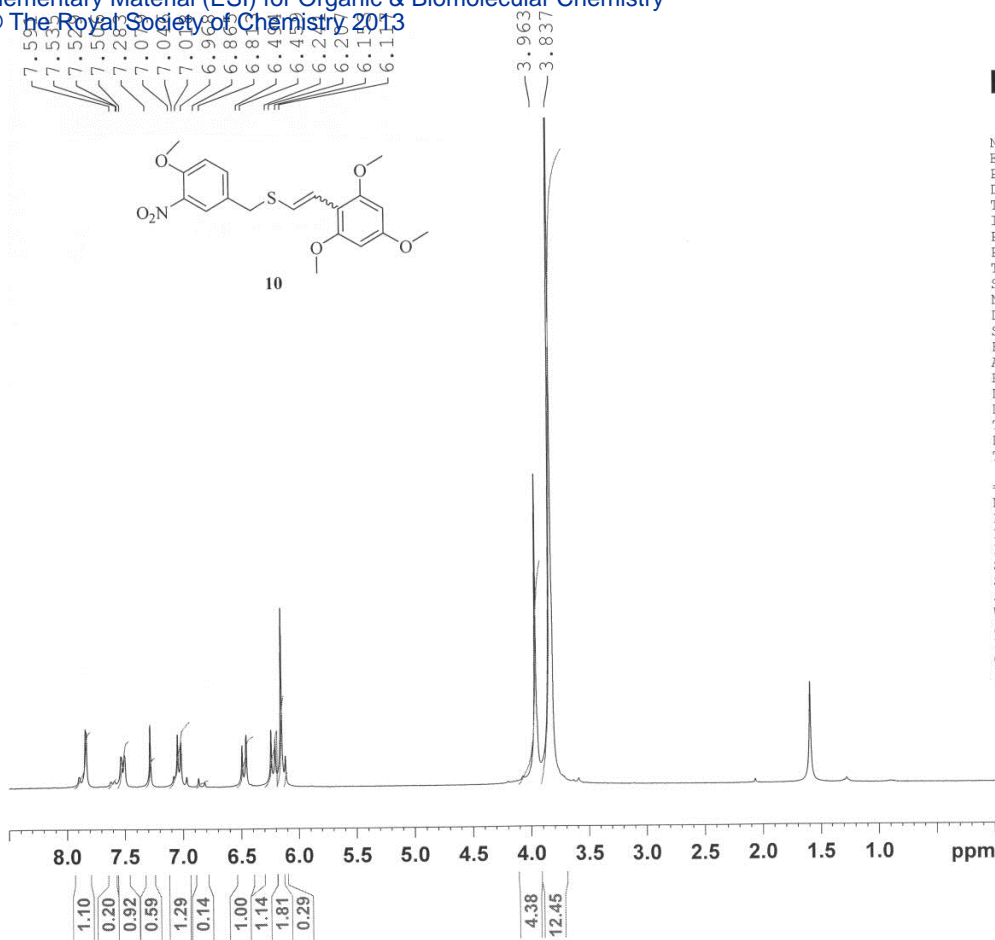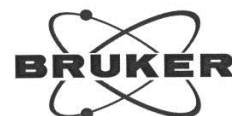

NAME venkat  
 EXPNO 1460  
 PROCNO 1  
 Date\_ 20120810  
 Time\_ 11.12  
 INSTRUM spect  
 PROBHD 5 mm PABBO BB-  
 PULPROG zg30  
 TD 65536  
 SOLVENT CDCl3  
 NS 16  
 DS 2  
 SWH 6188.119 Hz  
 FIDRES 0.094423 Hz  
 AQ 5.2953587 sec  
 RG 228  
 DW 80.800 usec  
 DE 6.50 usec  
 TE 291.7 K  
 D1 1.00000000 sec  
 TD0 1

===== CHANNEL f1 =====  
 NUC1 1H  
 P1 11.00 usec  
 PL1 0.00 dB  
 PL1W 11.02718163 W  
 SFO1 300.1318534 MHz  
 SI 32768  
 SF 300.1300000 MHz  
 WDW EM  
 SSB 0  
 LB 0.30 Hz  
 GB 0  
 PC 1.00

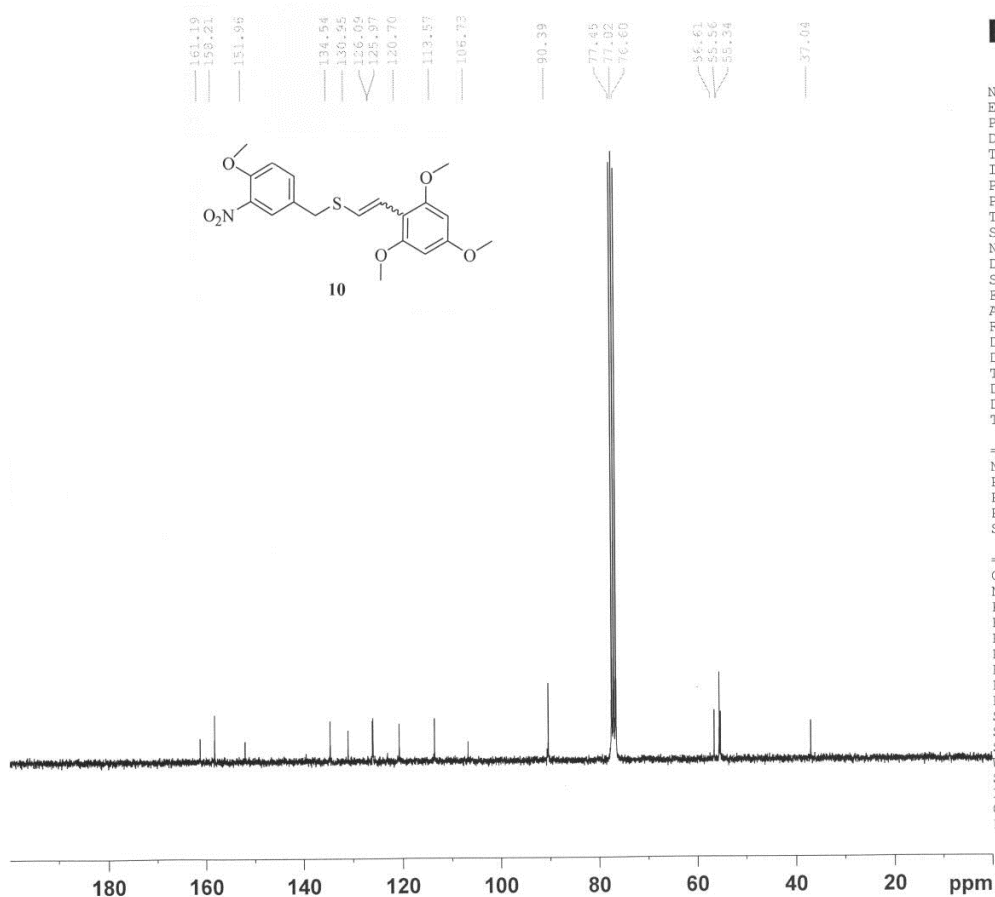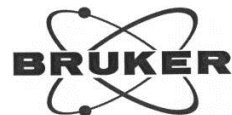

NAME venkat  
 EXPNO 1480  
 PROCNO 1  
 Date\_ 20120810  
 Time\_ 13.54  
 INSTRUM spect  
 PROBHD 5 mm PABBO BB-  
 PULPROG zgpg30  
 TD 65536  
 SOLVENT CDCl3  
 NS 2048  
 DS 4  
 SWH 18028.846 Hz  
 FIDRES 0.275098 Hz  
 AQ 1.8175818 sec  
 RG 456  
 DW 27.733 usec  
 DE 6.50 usec  
 TE 293.4 K  
 D1 2.00000000 sec  
 D11 0.03000000 sec  
 TD0 1

===== CHANNEL f1 =====  
 NUC1 13C  
 P1 9.25 usec  
 PL1 0.00 dB  
 PL1W 25.82219315 W  
 SFO1 75.4752953 MHz

===== CHANNEL f2 =====  
 CPDPRG2 waltz16  
 NUC2 1H  
 PCPD2 80.00 usec  
 PL2 0.00 dB  
 PL12 17.23 dB  
 PL13 18.00 dB  
 PL2W 11.02718163 W  
 PL12W 0.20867218 W  
 PL13W 0.17476904 W  
 SFO2 300.1312005 MHz  
 SI 32768  
 SF 75.4677490 MHz  
 WDW EM  
 SSB 0  
 LB 1.00 Hz  
 GB 0  
 PC 1.40

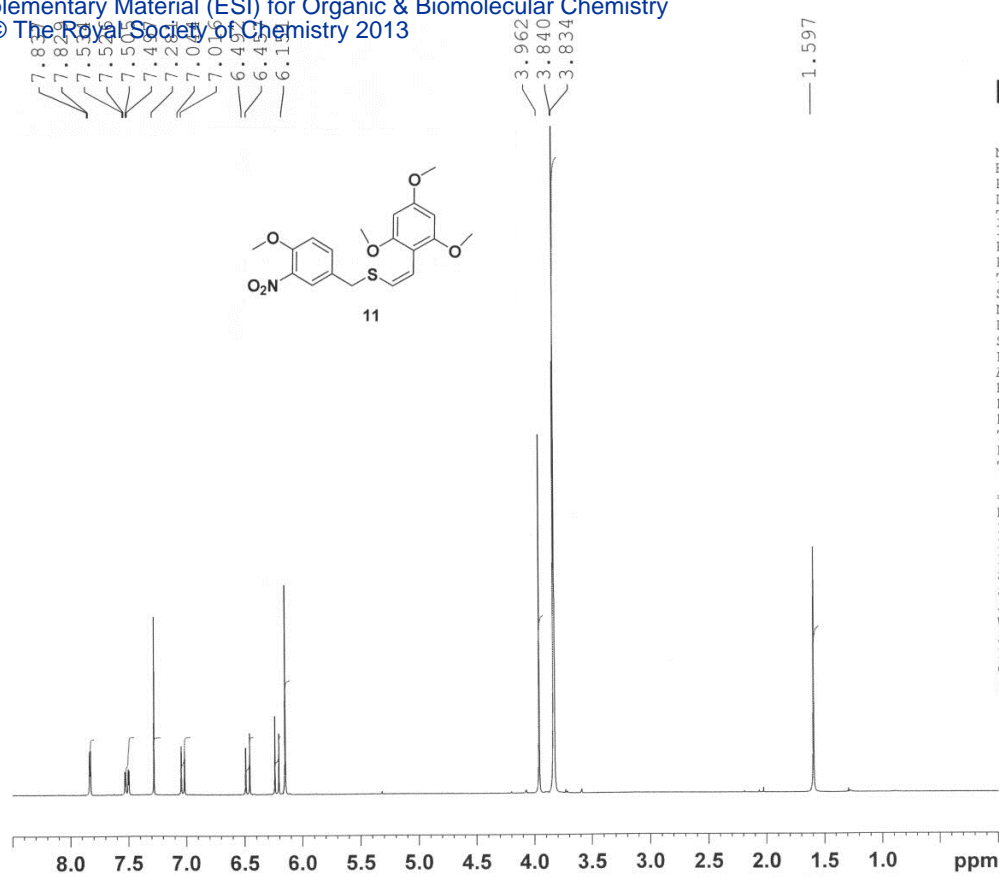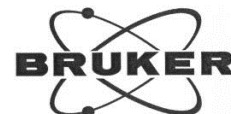

NAME murali  
 EXPNO 3210  
 PROCNO 1  
 Date\_ 20110804  
 Time\_ 11.44  
 INSTRUM spect  
 PROBHD 5 mm PABBO BB-  
 PULPROG zg30  
 TD 65536  
 SOLVENT CDCl3  
 NS 16  
 DS 2  
 SWH 6188.119 Hz  
 FIDRES 0.094423 Hz  
 AQ 5.2953587 sec  
 RG 362  
 DW 80.800 usec  
 DE 6.50 usec  
 TE 291.7 K  
 D1 1.00000000 sec  
 TD0 1

===== CHANNEL f1 =====  
 NUC1 1H  
 P1 11.00 usec  
 PL1 0.00 dB  
 PLLW 11.02718163 W  
 SFO1 300.1318534 MHz  
 SI 32768  
 SF 300.1300000 MHz  
 WDW EM  
 SSB 0  
 LB 0.30 Hz  
 GB 0  
 PC 1.00

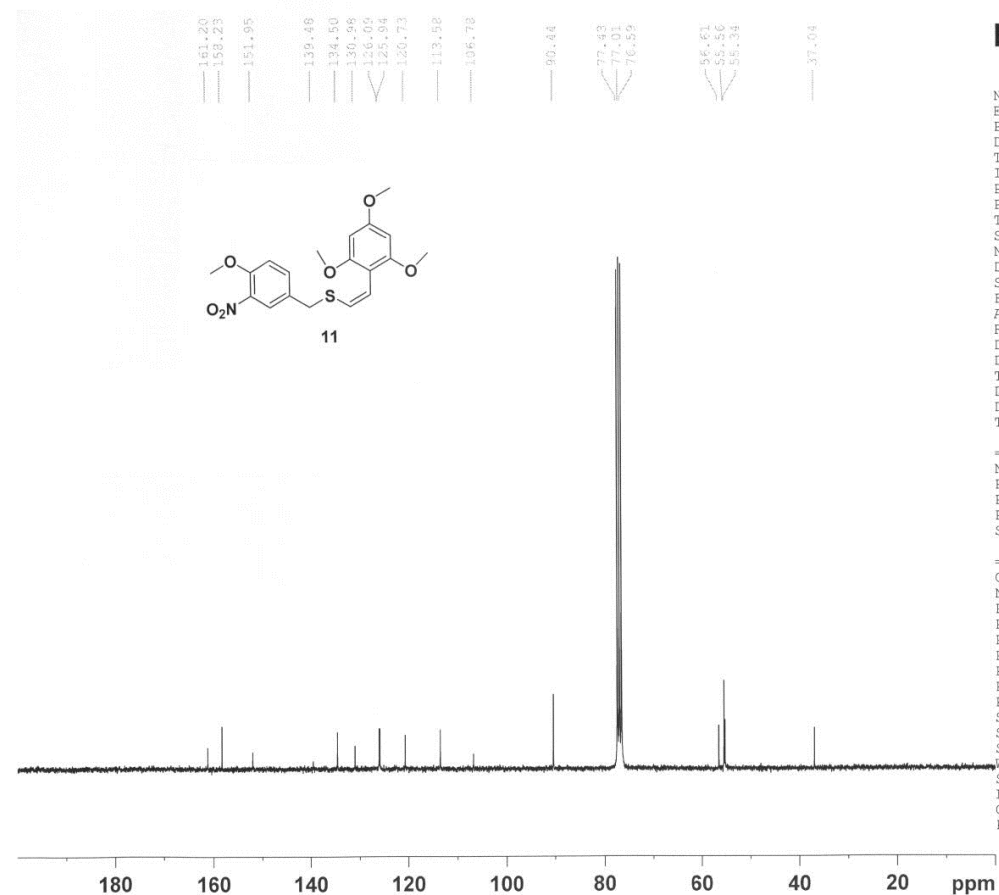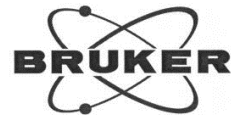

NAME venkat  
 EXPNO 1180  
 PROCNO 1  
 Date\_ 20120730  
 Time\_ 14.26  
 INSTRUM spect  
 PROBHD 5 mm PABBO BB-  
 PULPROG zgpg30  
 TD 65536  
 SOLVENT CDCl3  
 NS 4096  
 DS 4  
 SWH 18028.846 Hz  
 FIDRES 0.275098 Hz  
 AQ 1.8175818 sec  
 RG 456  
 DW 27.733 usec  
 DE 6.50 usec  
 TE 296.4 K  
 D1 2.00000000 sec  
 D11 0.03000000 sec  
 TD0 1

===== CHANNEL f1 =====  
 NUC1 13C  
 P1 9.25 usec  
 PL1 0.00 dB  
 PLLW 25.82219315 W  
 SFO1 75.4752953 MHz

===== CHANNEL f2 =====  
 CPDPRG2 waltz16  
 NUC2 1H  
 PCPD2 80.00 usec  
 PL2 0.00 dB  
 PL12 17.23 dB  
 PL13 18.00 dB  
 PL2W 11.02718163 W  
 PL12W 0.20867218 W  
 PL13W 0.17476904 W  
 SFO2 300.1312005 MHz  
 SI 32768  
 SF 75.4677490 MHz  
 WDW EM  
 SSB 0  
 LB 1.00 Hz  
 GB 0  
 PC 1.40

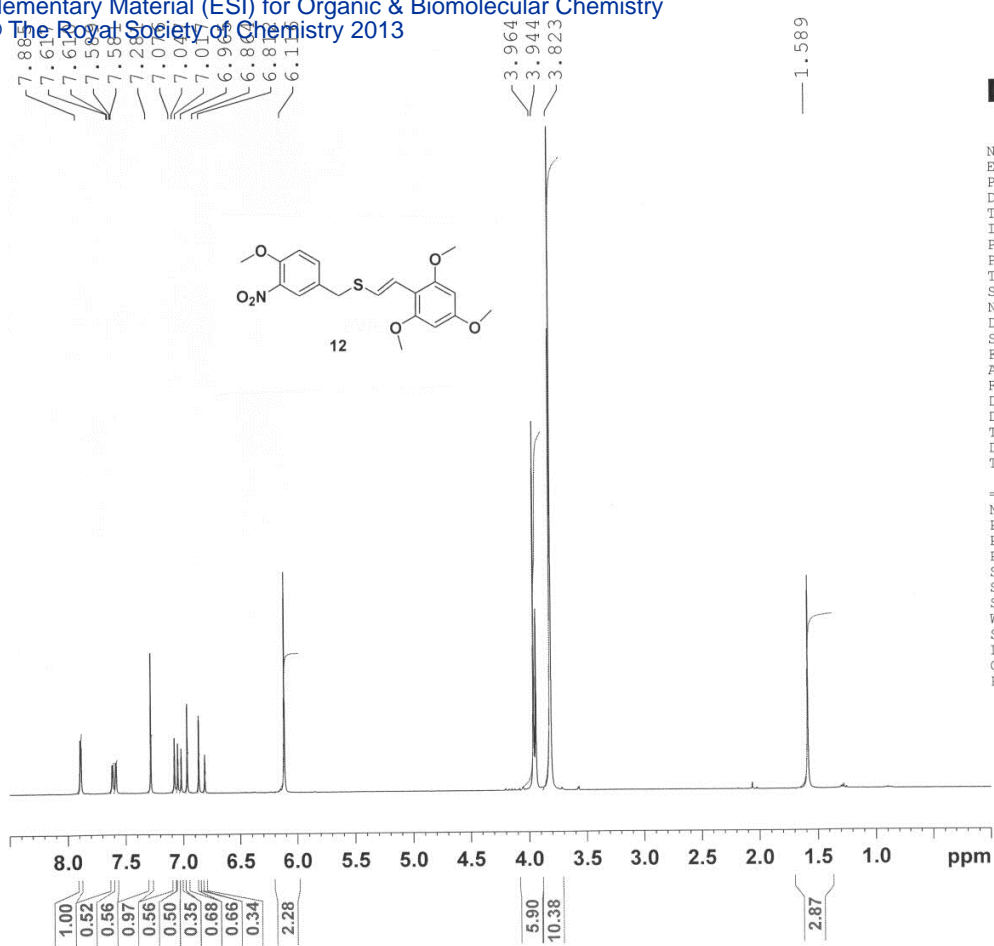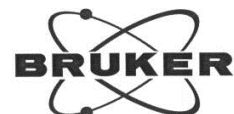

NAME murali  
 EXPNO 3060  
 PROCNO 1  
 Date\_ 20110721  
 Time 16.51  
 INSTRUM spect  
 PROBHD 5 mm PABBO BB-  
 PULPROG zg30  
 TD 65536  
 SOLVENT CDCl3  
 NS 16  
 DS 2  
 SWH 6188.119 Hz  
 FIDRES 0.094423 Hz  
 AQ 5.2953587 sec  
 RG 362  
 DW 80.800 usec  
 DE 6.50 usec  
 TE 293.8 K  
 D1 1.00000000 sec  
 TD0 1

===== CHANNEL f1 =====  
 NUC1 1H  
 P1 11.00 usec  
 PL1 0.00 dB  
 PLLW 11.02718163 W  
 SFO1 300.1318534 MHz  
 SI 32768  
 SF 300.1300000 MHz  
 WDW EM  
 SSB 0  
 LB 0.30 Hz  
 GB 0  
 PC 1.00

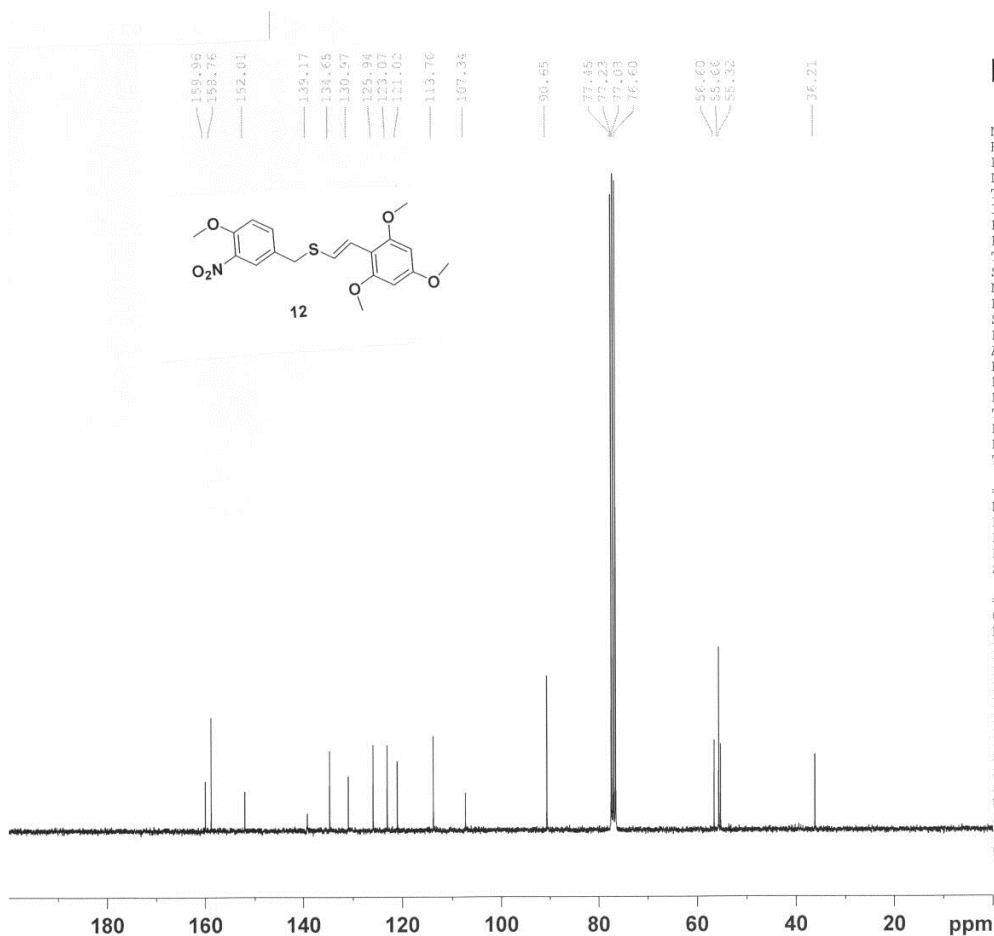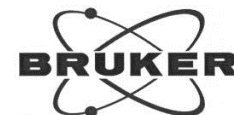

NAME venkat  
 EXPNO 1120  
 PROCNO 1  
 Date\_ 20120725  
 Time 16.05  
 INSTRUM spect  
 PROBHD 5 mm PABBO BB-  
 PULPROG zgpg30  
 TD 65536  
 SOLVENT CDCl3  
 NS 2048  
 DS 4  
 SWH 18028.846 Hz  
 FIDRES 0.275098 Hz  
 AQ 1.8175818 sec  
 RG 456  
 DW 27.733 usec  
 DE 6.50 usec  
 TE 292.9 K  
 D1 2.00000000 sec  
 D11 0.03000000 sec  
 TD0 1

===== CHANNEL f1 =====  
 NUC1 13C  
 P1 9.25 usec  
 PL1 0.00 dB  
 PLLW 25.82219315 W  
 SFO1 75.4752953 MHz

===== CHANNEL f2 =====  
 CPDPRG2 waltz16  
 NUC2 1H  
 PCPD2 80.00 usec  
 PL2 0.00 dB  
 PL12 17.23 dB  
 PL13 18.00 dB  
 PL2W 11.02718163 W  
 PL12W 0.20867218 W  
 PL13W 0.17476904 W  
 SFO2 300.1312005 MHz  
 SI 32768  
 SF 75.4677490 MHz  
 WDW EM  
 SSB 0  
 LB 1.00 Hz  
 GB 0  
 PC 1.40

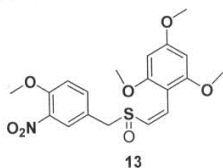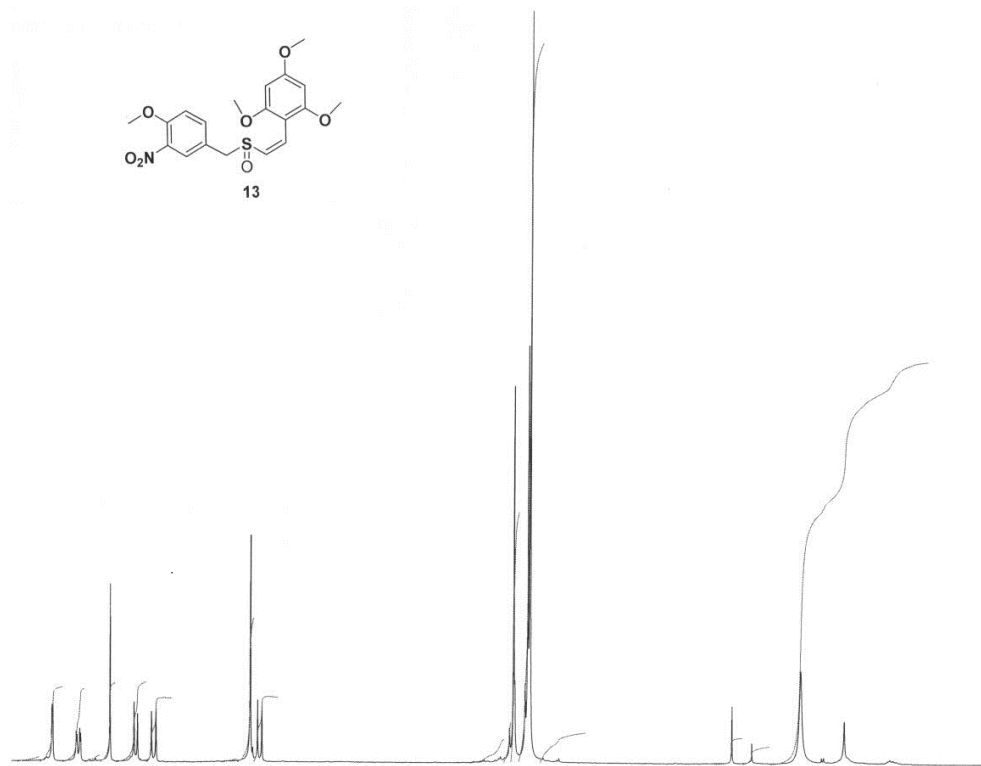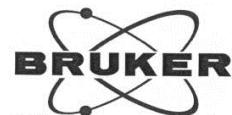

```

NAME      murali
EXPNO     645
PROCNO    1
Date_     20090619
Time      16.26
INSTRUM   spect
PROBHD    5 mm PABBO BB-
PULPROG   zg30
TD         65536
SOLVENT   CDCl3
NS         16
DS         2
SWH        6188.119 Hz
FIDRES     0.094423 Hz
AQ         5.2953587 sec
RG         322
DW         80.800 usec
DE         6.50 usec
TE         292.4 K
D1         1.00000000 sec
TD0        1
    
```

```

===== CHANNEL f1 =====
NUC1      1H
P1         11.00 usec
PL1        0.00 dB
PL1W      11.02718163 W
SFO1      300.1318534 MHz
SI         32768
SF         300.1300223 MHz
WDW        EM
SSB         0
LB         0.30 Hz
GB         0
PC         1.00
    
```

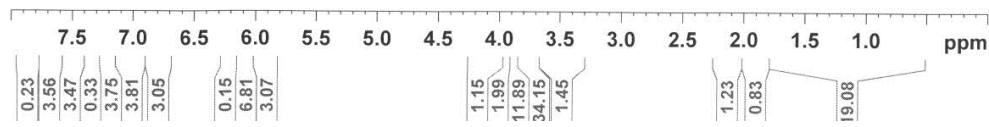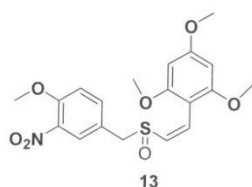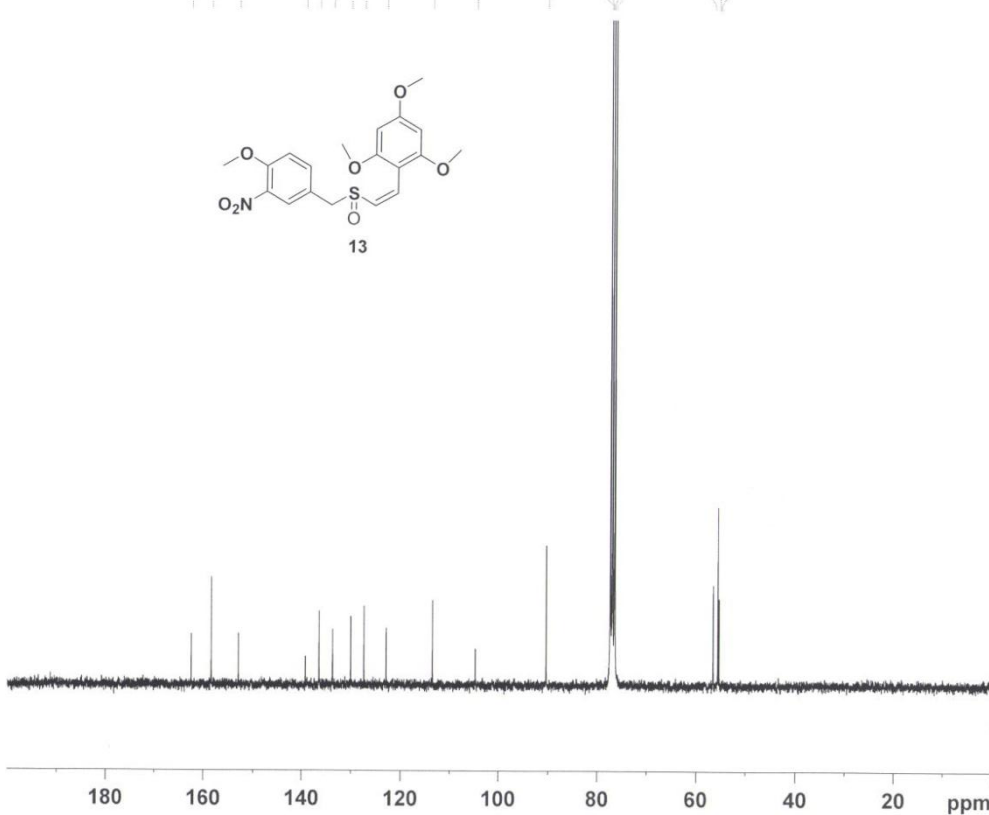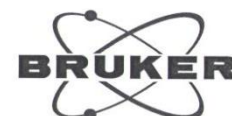

```

NAME      murali
EXPNO     6010
PROCNO    1
Date_     20120914
Time      3.13
INSTRUM   spect
PROBHD    5 mm PABBO BB-
PULPROG   zgpg30
TD         65536
SOLVENT   CDCl3
NS         10240
DS         4
SWH        18028.846 Hz
FIDRES     0.275098 Hz
AQ         1.8175818 sec
RG         575
DW         27.733 usec
DE         6.50 usec
TE         293.5 K
D1         2.00000000 sec
D11        0.03000000 sec
TD0        1
    
```

```

===== CHANNEL f1 =====
NUC1      13C
P1         9.25 usec
PL1        0.00 dB
PL1W      25.82219315 W
SFO1      75.4752953 MHz
    
```

```

===== CHANNEL f2 =====
CPDPRG2   waltz16
NUC2      1H
PCPD2     80.00 usec
PL2        0.00 dB
PL12      17.23 dB
PL13      18.00 dB
PL2W      11.02718163 W
PL12W     0.20867218 W
PL13W     0.17476904 W
SFO2      300.1312005 MHz
SI         32768
SF         75.4677490 MHz
WDW        EM
SSB         0
LB         1.00 Hz
GB         0
PC         1.40
    
```



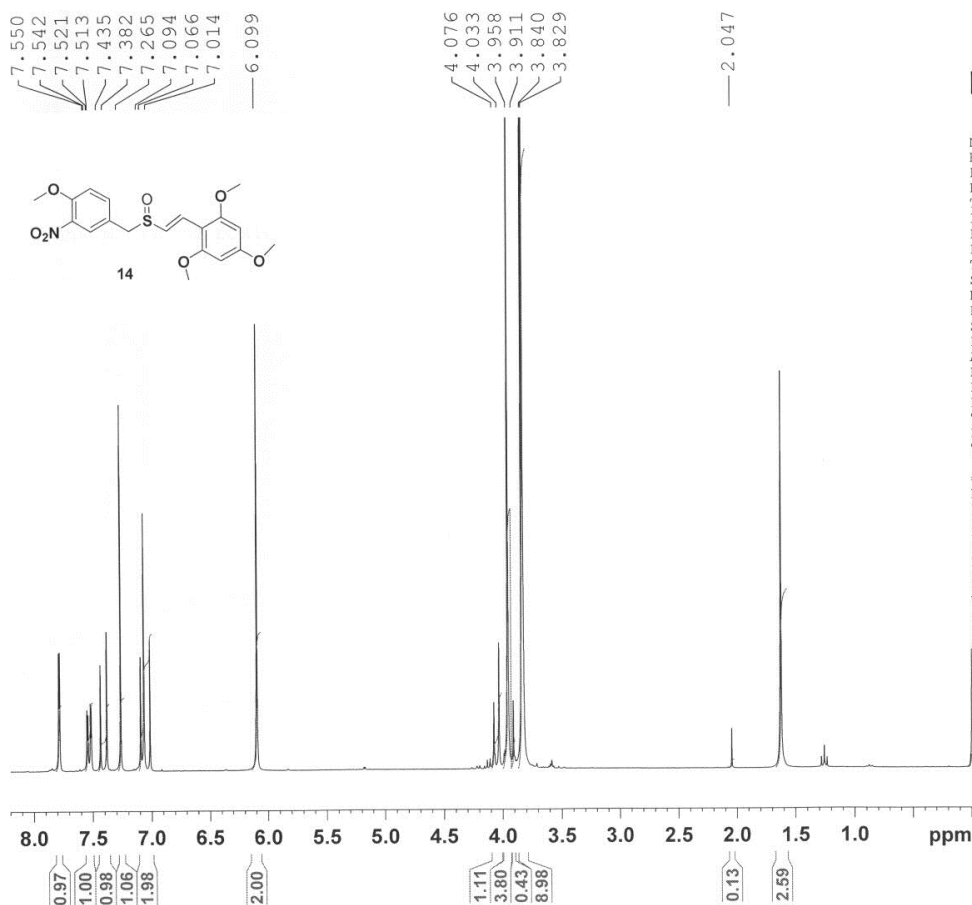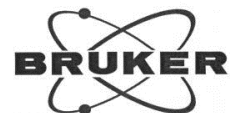

NAME venkat  
 EXPNO 1520  
 PROCNO 1  
 Date\_ 20120831  
 Time\_ 13.46  
 INSTRUM spect  
 PROBHD 5 mm PABBO BB-  
 PULPROG zg30  
 TD 65536  
 SOLVENT CDCl3  
 NS 128  
 DS 0  
 SWH 6188.119 Hz  
 FIDRES 0.094423 Hz  
 AQ 5.2953587 sec  
 RG 362  
 DW 80.800 usec  
 DE 6.50 usec  
 TE 291.7 K  
 D1 2.00000000 sec  
 TD0 1

===== CHANNEL f1 =====  
 NUC1 1H  
 P1 11.00 usec  
 PL1 0.00 dB  
 PL1W 11.02718163 W  
 SFO1 300.1318534 MHz  
 SI 32768  
 SF 300.1300049 MHz  
 WDW EM  
 SSB 0  
 LB 0.30 Hz  
 GB 0  
 PC 1.00

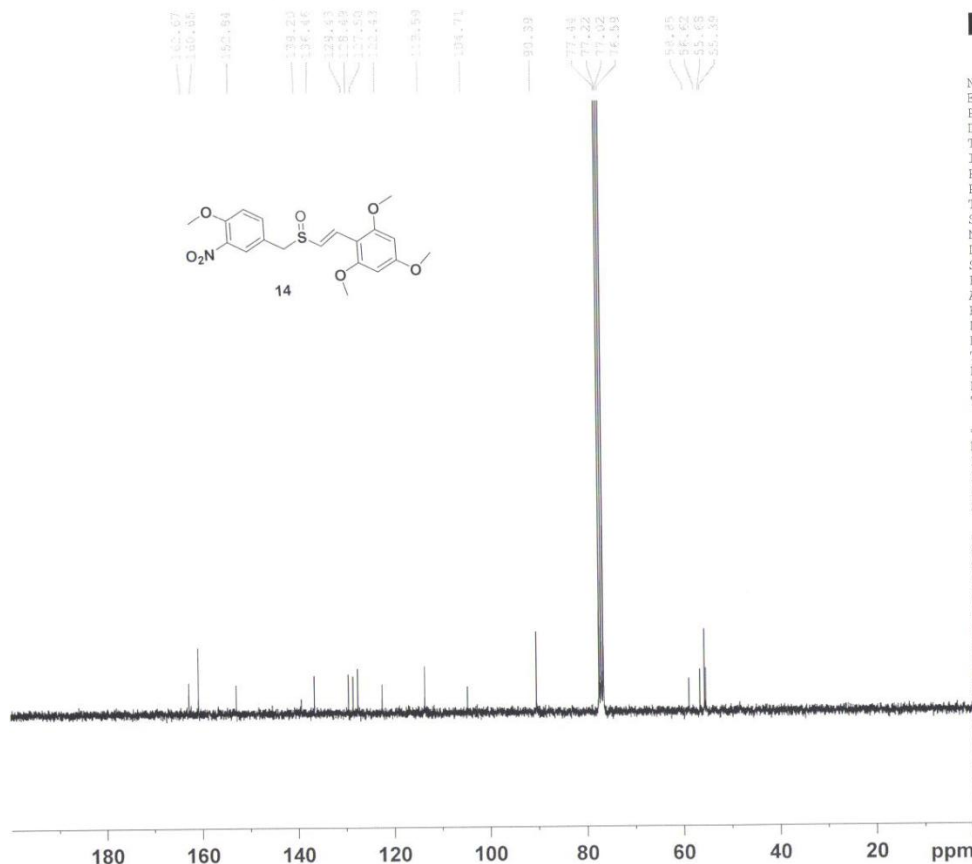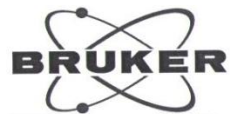

NAME venkat  
 EXPNO 1530  
 PROCNO 1  
 Date\_ 20120831  
 Time\_ 15.03  
 INSTRUM spect  
 PROBHD 5 mm PABBO BB-  
 PULPROG zgpg30  
 TD 65536  
 SOLVENT CDCl3  
 NS 1024  
 DS 4  
 SWH 18028.846 Hz  
 FIDRES 0.275098 Hz  
 AQ 1.8175818 sec  
 RG 456  
 DW 27.733 usec  
 DE 6.50 usec  
 TE 293.2 K  
 D1 2.00000000 sec  
 D11 0.03000000 sec  
 TD0 1

===== CHANNEL f1 =====  
 NUC1 13C  
 P1 9.25 usec  
 PL1 0.00 dB  
 PL1W 25.82219315 W  
 SFO1 75.4752953 MHz

===== CHANNEL f2 =====  
 CPDPRG2 waltz16  
 NUC2 1H  
 PCPD2 80.00 usec  
 PL2 0.00 dB  
 PL12 17.23 dB  
 PL13 18.00 dB  
 PL2W 11.02718163 W  
 PL12W 0.20867218 W  
 PL13W 0.17476904 W  
 SFO2 300.1312005 MHz  
 SI 32768  
 SF 75.4677490 MHz  
 WDW EM  
 SSB 0  
 LB 1.00 Hz  
 GB 0  
 PC 1.40



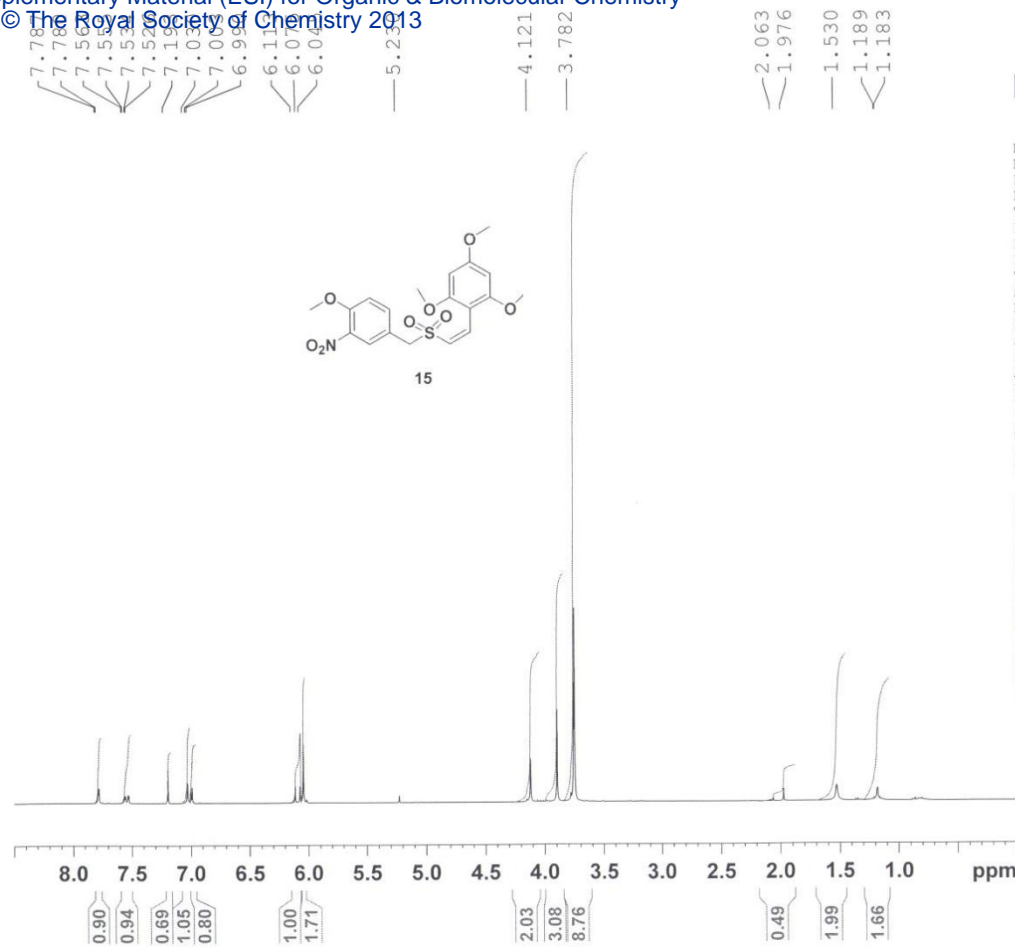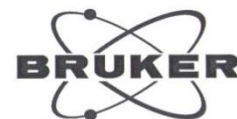

```

NAME      venkat
EXPNO    1540
PROCNO   1
Date_    20120914
Time     15.29
INSTRUM spect
PROBHD   5 mm PABBO BB-
PULPROG zg30
TD        65536
SOLVENT  CDCl3
NS        16
DS        2
SWH      6188.119 Hz
FIDRES   0.094423 Hz
AQ        5.2953587 sec
RG        228
DW        80.800 usec
DE        6.50 usec
TE        291.7 K
D1        1.00000000 sec
TD0       1
    
```

```

===== CHANNEL f1 =====
NUC1      1H
P1        11.00 usec
PL1       0.00 dB
PL1W      11.02718163 W
SFO1      300.1318534 MHz
SI        32768
SF        300.1300265 MHz
WDW       EM
SSB       0
LB        0.30 Hz
GB        0
PC        1.00
    
```

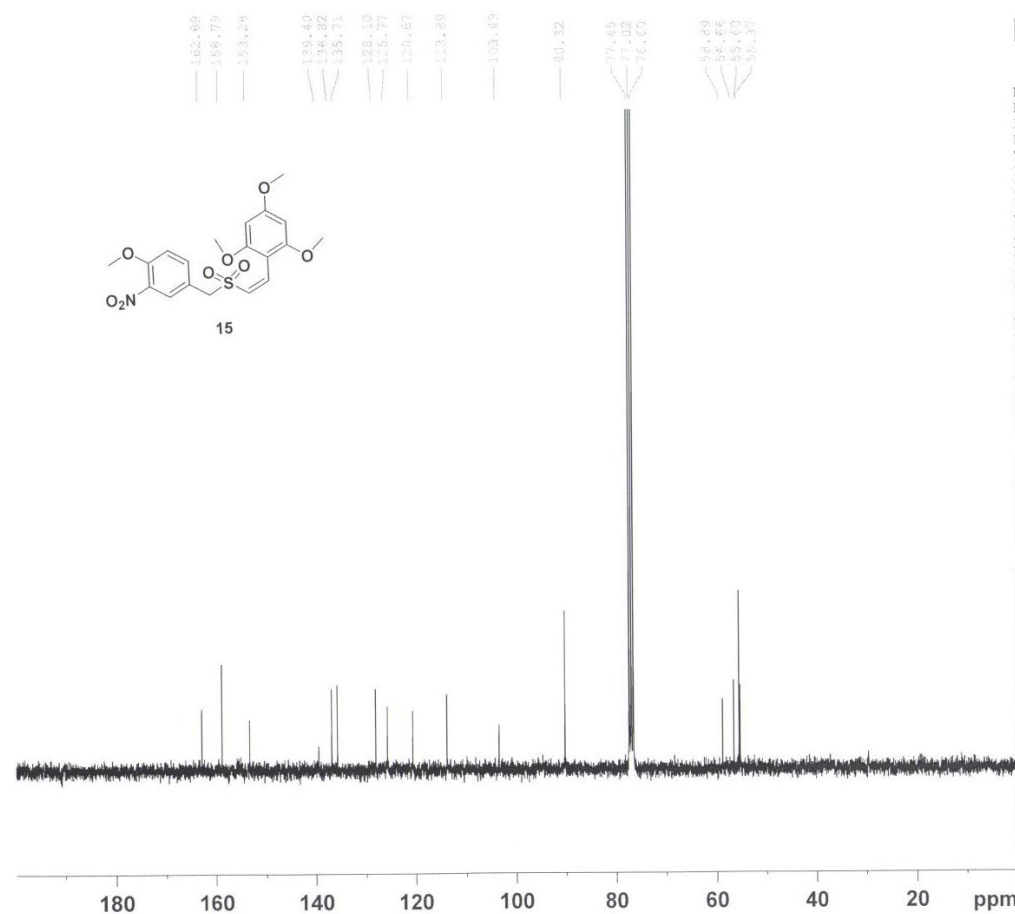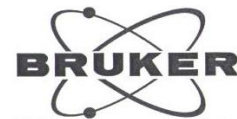

```

NAME      venkat
EXPNO    1550
PROCNO   1
Date_    20120914
Time     16.41
INSTRUM spect
PROBHD   5 mm PABBO BB-
PULPROG zgpg30
TD        65536
SOLVENT  CDCl3
NS        1024
DS        4
SWH      18028.846 Hz
FIDRES   0.275098 Hz
AQ        1.8175818 sec
RG        512
DW        27.733 usec
DE        6.50 usec
TE        292.9 K
D1        2.00000000 sec
D11       0.03000000 sec
TD0       1
    
```

```

===== CHANNEL f1 =====
NUC1      13C
P1        9.25 usec
PL1       0.00 dB
PL1W      25.82219315 W
SFO1      75.4752953 MHz
    
```

```

===== CHANNEL f2 =====
CPDPRG2  waltz16
NUC2      1H
PCPD2     80.00 usec
PL2       0.00 dB
PL12      17.23 dB
PL13      18.00 dB
PL2W      11.02718163 W
PL12W     0.20867218 W
PL13W     0.17476904 W
SFO2      300.1312005 MHz
SI        32768
SF        75.4677490 MHz
WDW       EM
SSB       0
LB        1.00 Hz
GB        0
PC        1.40
    
```

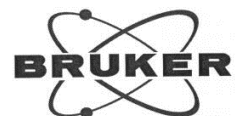

```

NAME      murali
EXPNO    542
PROCNO   1
Date_    20090520
Time     15.37
INSTRUM  spect
PROBHD   5 mm PABBO BB-
PULPROG  zg30
TD       65536
SOLVENT  CDCl3
NS       32
DS       2
SWH      6188.119 Hz
FIDRES   0.094423 Hz
AQ       5.2953587 sec
RG       287
DW       80.800 usec
DE       6.50 usec
TE       292.4 K
D1       1.0000000 sec
TD0      1
    
```

```

===== CHANNEL f1 =====
NUC1     1H
P1       11.00 usec
PL1     0.00 dB
PL1W    11.02718163 W
SF01    300.1318534 MHz
SI       32768
SF       300.1300000 MHz
WDW      EM
SSB      0
LB       0.30 Hz
GB       0
PC       1.00
    
```

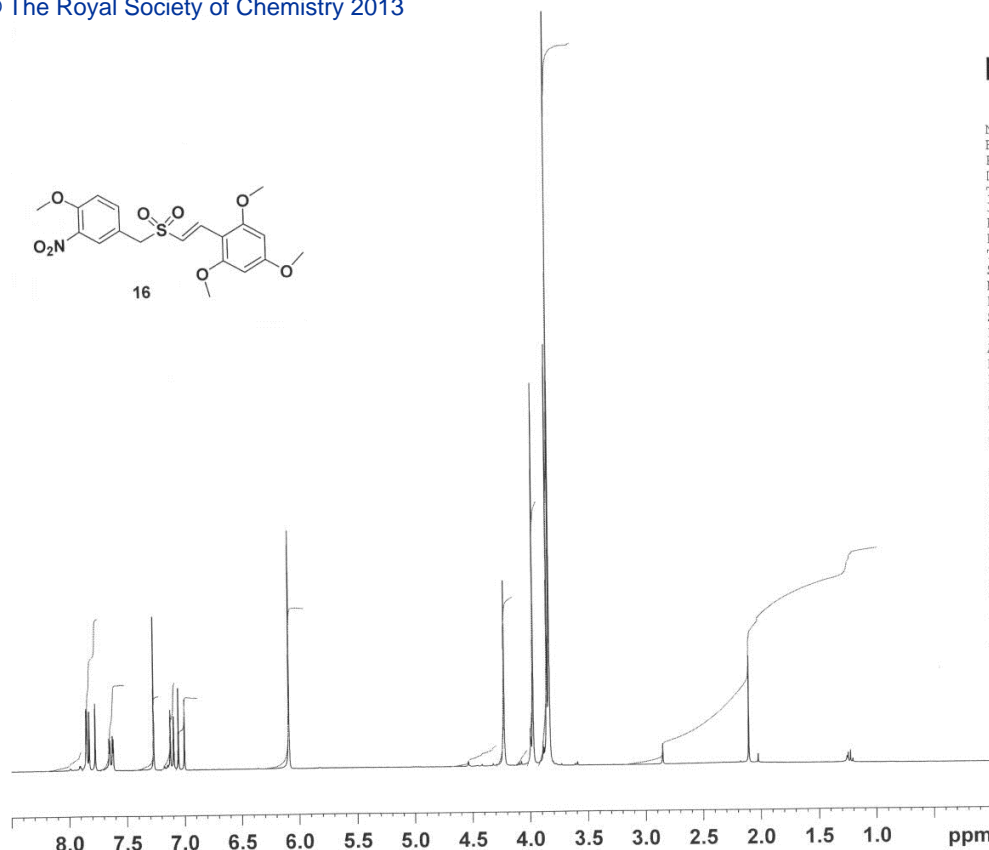

Integration values: 0.94, 7.34, 4.15, 3.60, 4.28, 3.49, 7.76, 1.03, 8.22, 0.79, 12.86, 35.16, 10.41

Chemical shift values (ppm): 168.18, 161.62, 153.16, 139.30, 136.90, 136.83, 127.99, 121.44, 121.39, 113.85, 103.59, 90.39, 77.44, 77.22, 77.02, 76.60, 60.53, 56.66, 55.77, 55.47

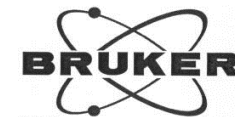

```

NAME      venkat
EXPNO    1100
PROCNO   1
Date_    20120725
Time     13.01
INSTRUM  spect
PROBHD   5 mm PABBO BB-
PULPROG  zgpg30
TD       65536
SOLVENT  CDCl3
NS       2048
DS       4
SWH      18028.846 Hz
FIDRES   0.275098 Hz
AQ       1.8175818 sec
RG       512
DW       27.733 usec
DE       6.50 usec
TE       293.7 K
D1       2.0000000 sec
D11     0.03000000 sec
TD0      1
    
```

```

===== CHANNEL f1 =====
NUC1     13C
P1       9.25 usec
PL1     0.00 dB
PL1W    25.82219315 W
SF01    75.4752953 MHz
    
```

```

===== CHANNEL f2 =====
CPDPRG2  waltz16
NUC2     1H
PCPD2    80.00 usec
PL2     0.00 dB
PL12    17.23 dB
PL13    18.00 dB
PL2W    11.02718163 W
PL12W   0.20867218 W
PL13W   0.17476904 W
SF02    300.1312005 MHz
SI       32768
SF       75.4677490 MHz
WDW      EM
SSB      0
LB       1.00 Hz
GB       0
PC       1.40
    
```

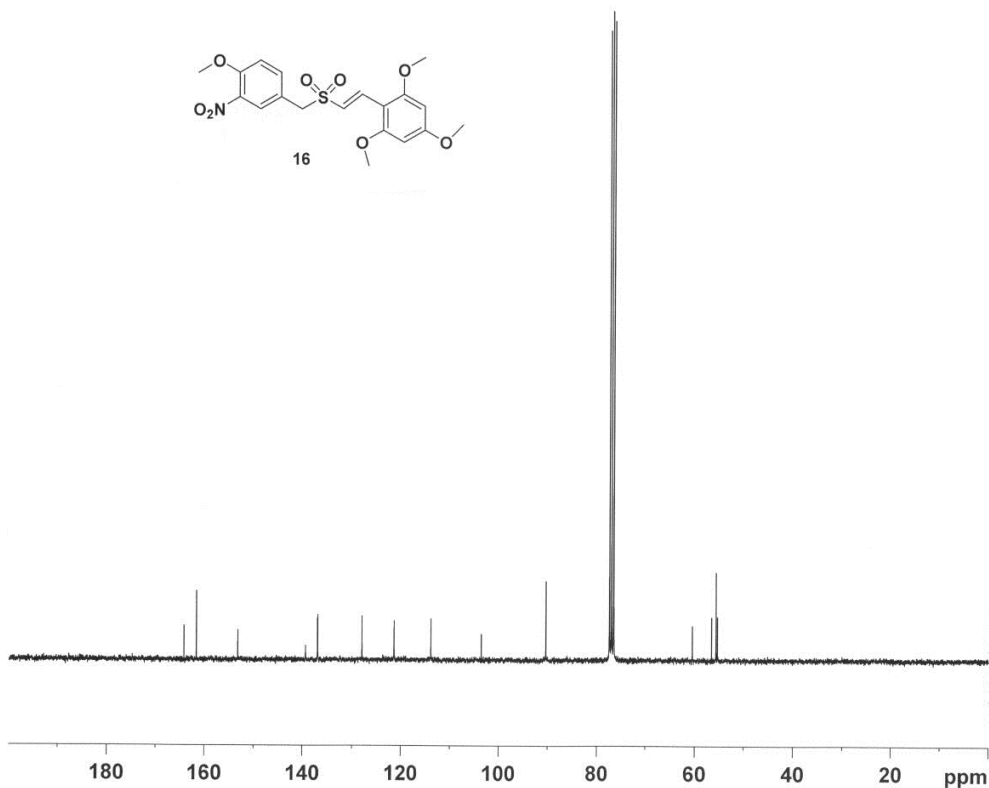

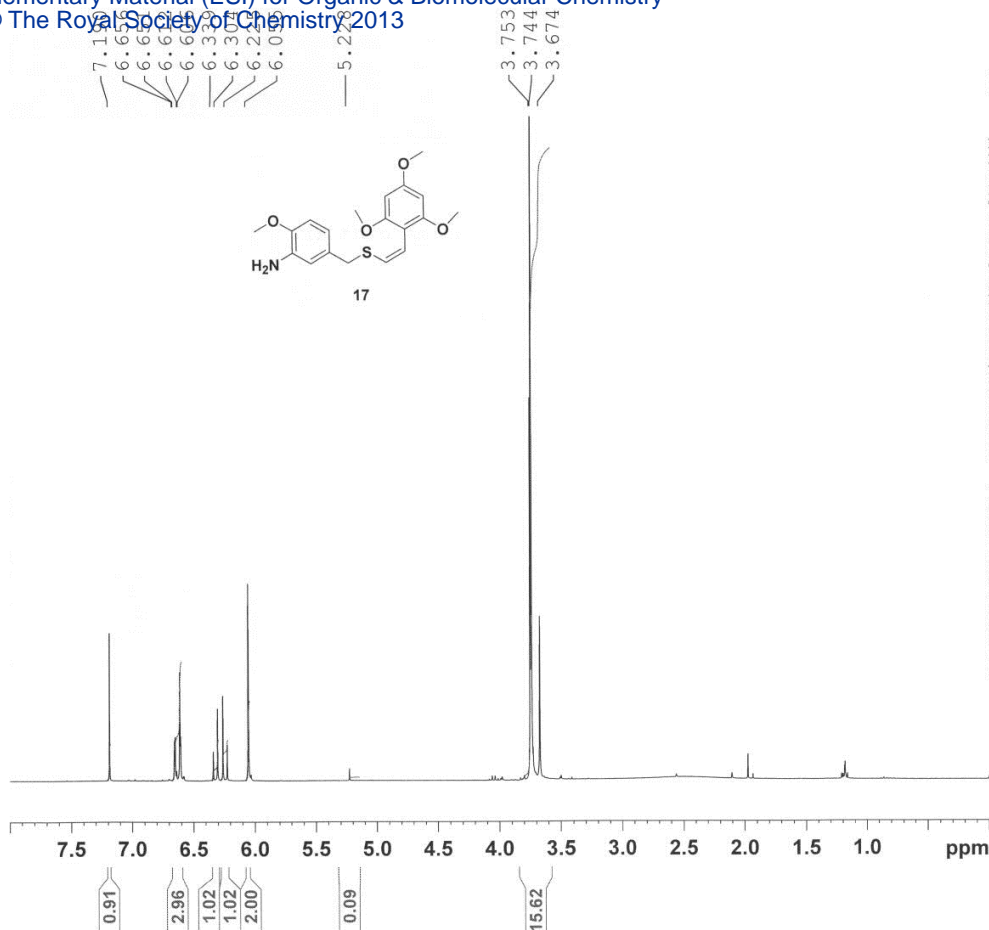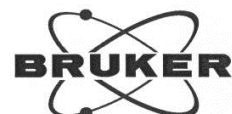

NAME murali  
 EXPNO 3340  
 PROCNO 1  
 Date\_ 20110812  
 Time\_ 10.32  
 INSTRUM spect  
 PROBHD 5 mm PABBO BB-  
 PULPROG zg30  
 TD 65536  
 SOLVENT CDCl3  
 NS 16  
 DS 2  
 SWH 6188.119 Hz  
 FIDRES 0.094423 Hz  
 AQ 5.2953587 sec  
 RG 228  
 DW 80.800 usec  
 DE 6.50 usec  
 TE 291.2 K  
 D1 1.00000000 sec  
 TD0 1

===== CHANNEL f1 =====  
 NUC1 1H  
 P1 11.00 usec  
 PL1 0.00 dB  
 PL1W 11.02718163 W  
 SFO1 300.1318534 MHz  
 SI 32768  
 SF 300.1300273 MHz  
 WDW EM  
 SSB 0  
 LB 0.30 Hz  
 GB 0  
 PC 1.00

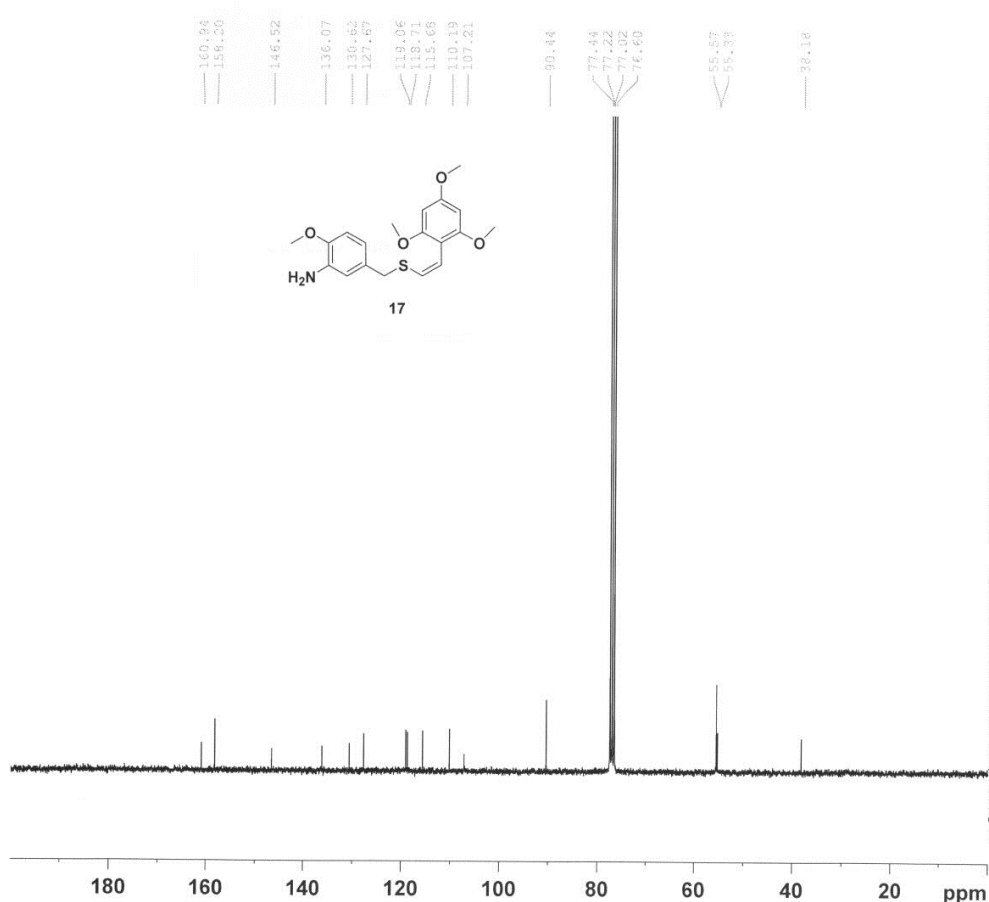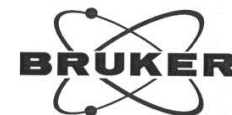

NAME venkat  
 EXPNO 1130  
 PROCNO 1  
 Date\_ 20120726  
 Time\_ 12.00  
 INSTRUM spect  
 PROBHD 5 mm PABBO BB-  
 PULPROG zgpg30  
 TD 65536  
 SOLVENT CDCl3  
 NS 2048  
 DS 4  
 SWH 18028.846 Hz  
 FIDRES 0.275098 Hz  
 AQ 1.8175818 sec  
 RG 456  
 DW 27.733 usec  
 DE 6.50 usec  
 TE 293.4 K  
 D1 2.00000000 sec  
 D11 0.03000000 sec  
 TD0 1

===== CHANNEL f1 =====  
 NUC1 13C  
 P1 9.25 usec  
 PL1 0.00 dB  
 PL1W 25.82219315 W  
 SFO1 75.4752953 MHz

===== CHANNEL f2 =====  
 CPDPRG2 waltz16  
 NUC2 1H  
 PCPD2 80.00 usec  
 PL2 0.00 dB  
 PL12 17.23 dB  
 PL13 18.00 dB  
 PL2W 11.02718163 W  
 PL12W 0.20867218 W  
 PL13W 0.17476904 W  
 SFO2 300.1312005 MHz  
 SI 32768  
 SF 75.4677490 MHz  
 WDW EM  
 SSB 0  
 LB 1.00 Hz  
 GB 0  
 PC 1.40

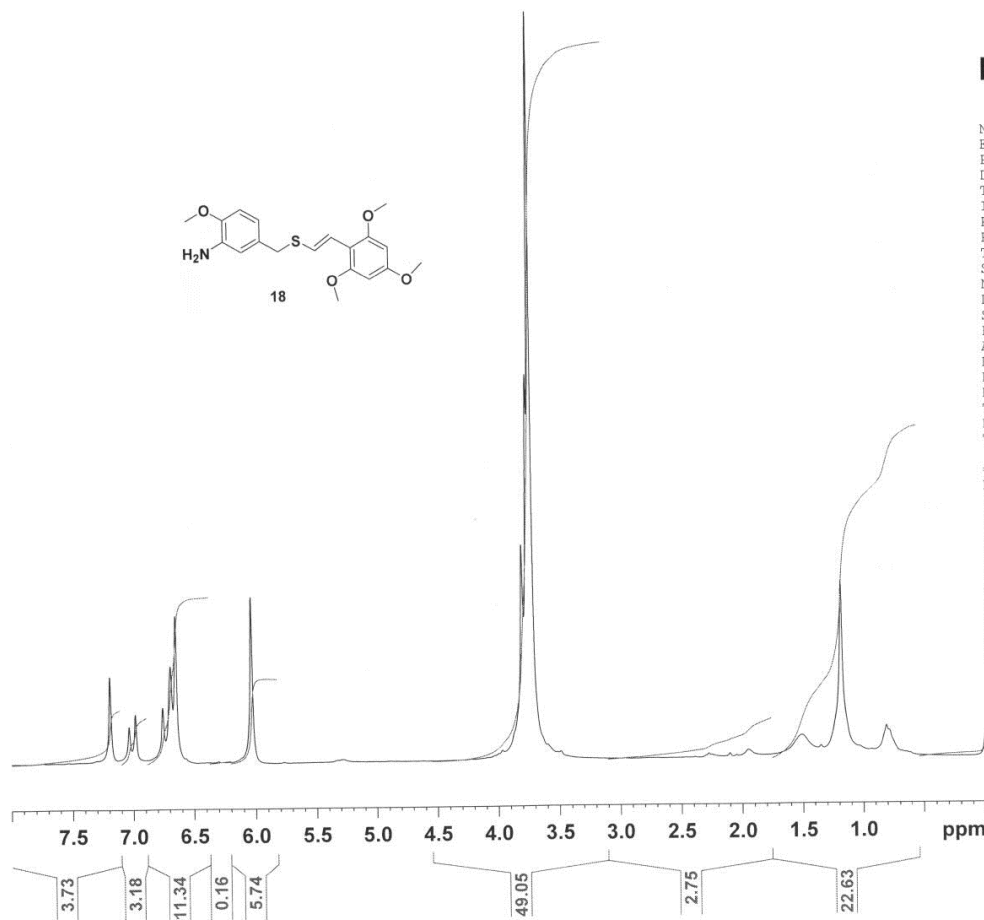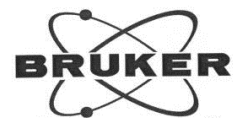

NAME murali  
 EXPNO 366  
 PROCNO 1  
 Date 20081024  
 Time 12.04  
 INSTRUM spect  
 PROBHD 5 mm PABBO BB-  
 PULPROG zg30  
 TD 65536  
 SOLVENT CDCl3  
 NS 128  
 DS 0  
 SWH 6188.119 Hz  
 FIDRES 0.094423 Hz  
 AQ 5.2953587 sec  
 RG 256  
 DW 80.800 usec  
 DE 6.50 usec  
 TE 291.4 K  
 D1 2.00000000 sec  
 TD0 1

===== CHANNEL f1 =====  
 NUC1 1H  
 P1 11.00 usec  
 PL1 0.00 dB  
 PL1W 11.02718163 W  
 SFO1 300.1318534 MHz  
 SI 32768  
 SF 300.1300237 MHz  
 WDW EM  
 SSB 0  
 LB 0.30 Hz  
 GB 0  
 PC 1.00

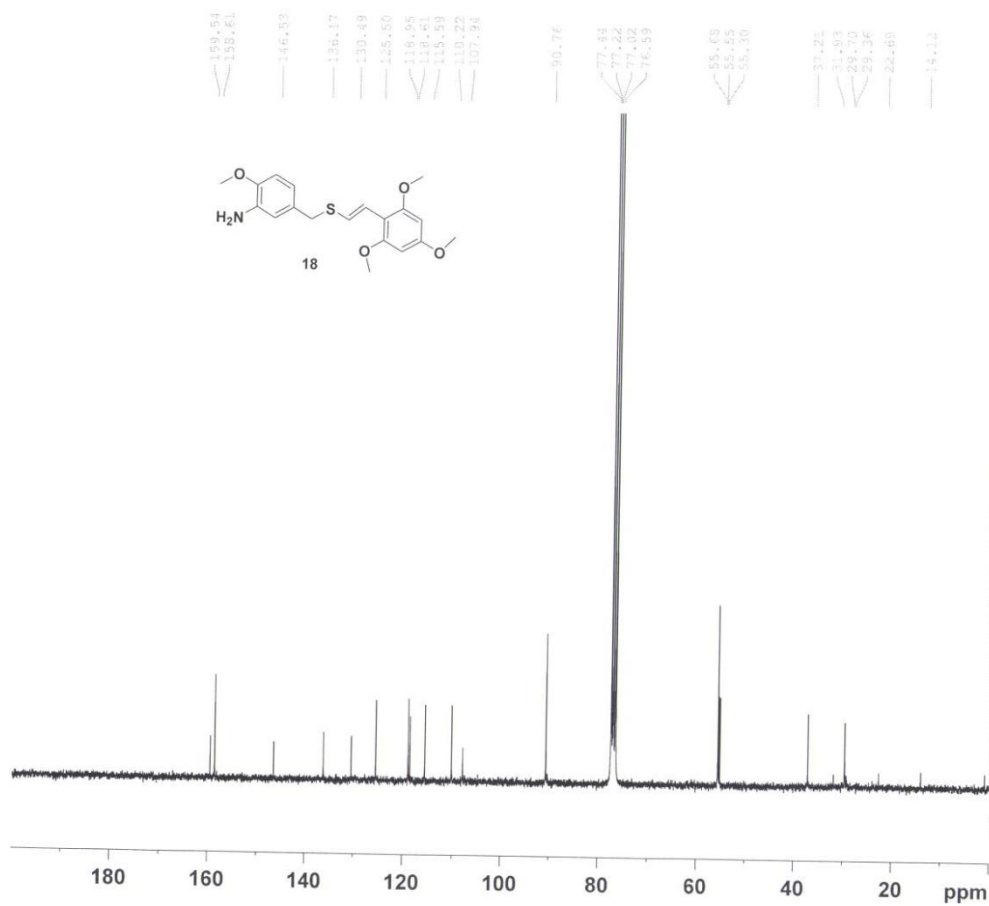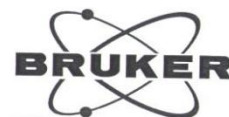

NAME murali  
 EXPNO 6060  
 PROCNO 1  
 Date 20120915  
 Time 9.34  
 INSTRUM spect  
 PROBHD 5 mm PABBO BB-  
 PULPROG zgpg30  
 TD 65536  
 SOLVENT CDCl3  
 NS 15360  
 DS 4  
 SWH 18028.846 Hz  
 FIDRES 0.275098 Hz  
 AQ 1.8175818 sec  
 RG 575  
 DW 27.733 usec  
 DE 6.50 usec  
 TE 293.9 K  
 D1 2.00000000 sec  
 D11 0.03000000 sec  
 TD0 1

===== CHANNEL f1 =====  
 NUC1 13C  
 P1 9.25 usec  
 PL1 0.00 dB  
 PL1W 25.82219315 W  
 SFO1 75.4752953 MHz

===== CHANNEL f2 =====  
 CPDPRG2 waltz16  
 NUC2 1H  
 PCPD2 80.00 usec  
 PL2 0.00 dB  
 PL12 17.23 dB  
 PL13 18.00 dB  
 PL2W 11.02718163 W  
 PL12W 0.20867218 W  
 PL13W 0.17476904 W  
 SFO2 300.1312005 MHz  
 SI 32768  
 SF 75.4677490 MHz  
 WDW EM  
 SSB 0  
 LB 1.00 Hz  
 GB 0  
 PC 1.40

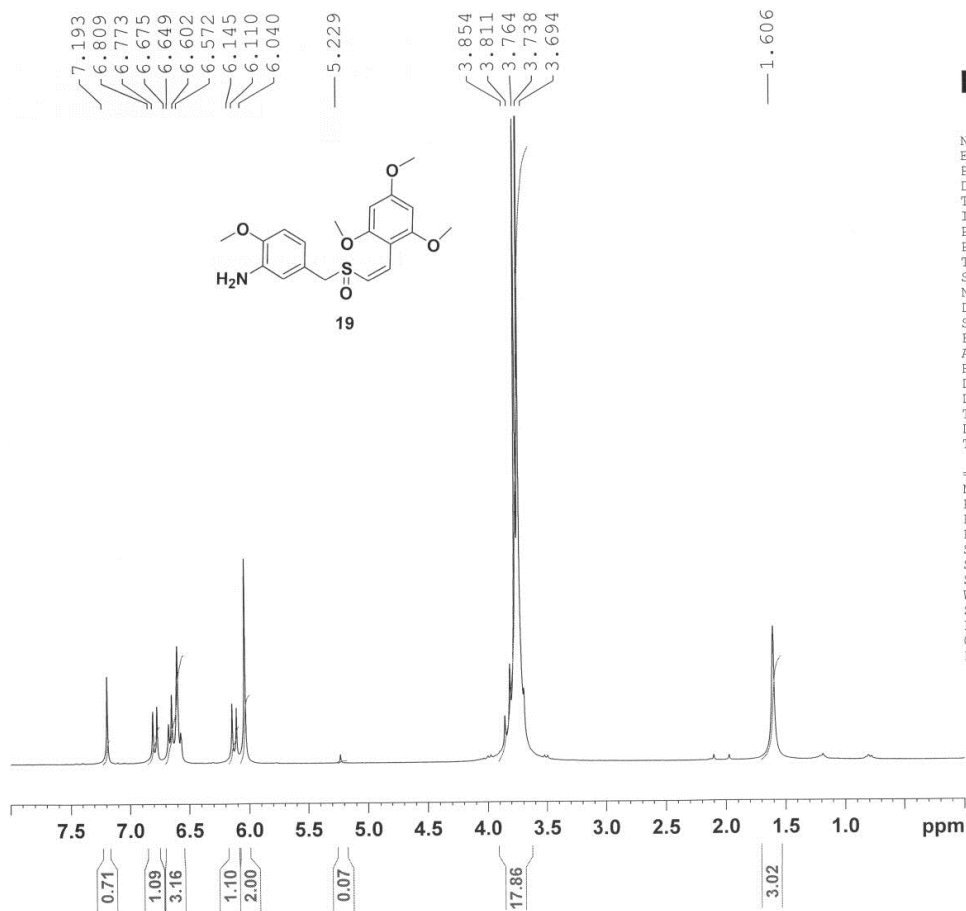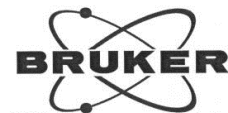

```

NAME      venkat
EXPNO    1410
PROCNO   1
Date_    20120809
Time     14.06
INSTRUM  spect
PROBHD   5 mm PABBO BB-
PULPROG  zg30
TD       65536
SOLVENT  CDCl3
NS       128
DS       0
SWH      6188.119 Hz
FIDRES   0.094423 Hz
AQ       5.2953587 sec
RG       203
DW       80.800 usec
DE       6.50 usec
TE       291.7 K
D1       2.00000000 sec
TD0      1
    
```

```

===== CHANNEL f1 =====
NUC1      1H
P1        11.00 usec
PL1       0.00 dB
PL1W      11.02718163 W
SFO1     300.1318534 MHz
SI        32768
SF        300.1300269 MHz
WDW       EM
SSB       0
LB        0.30 Hz
GB        0
PC        1.00
    
```

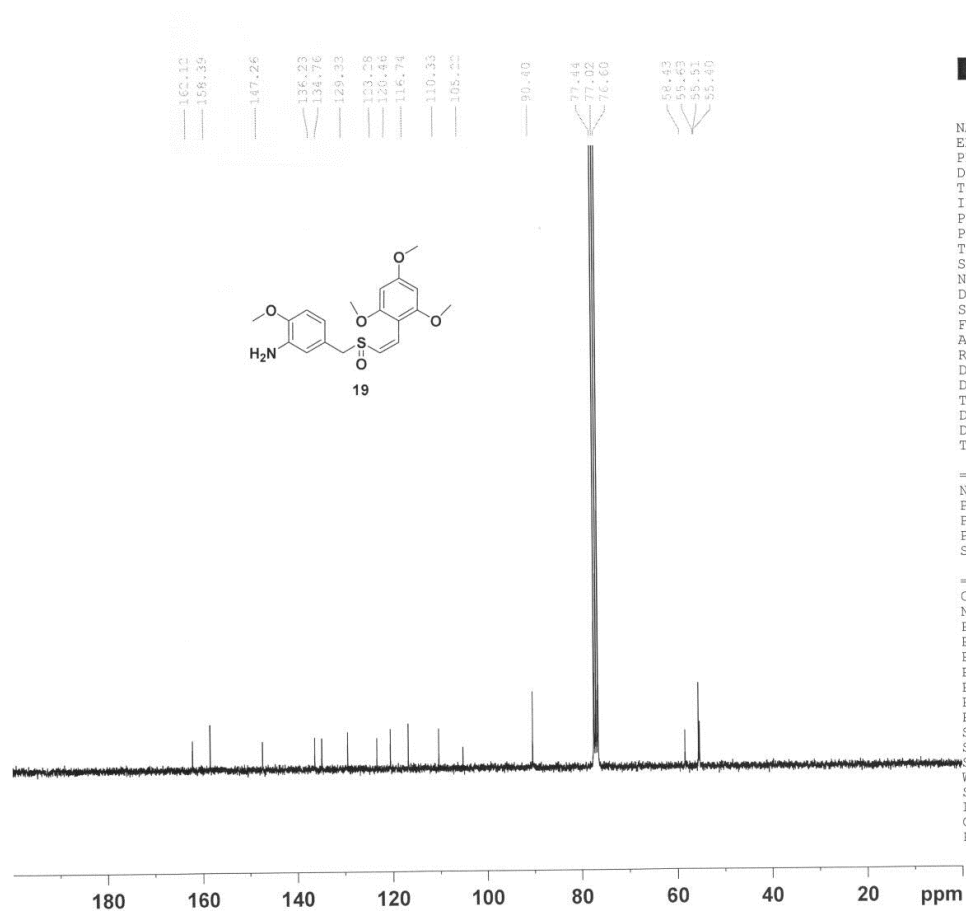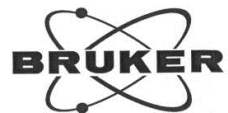

```

NAME      venkat
EXPNO    1420
PROCNO   1
Date_    20120809
Time     16.31
INSTRUM  spect
PROBHD   5 mm PABBO BB-
PULPROG  zgpg30
TD       65536
SOLVENT  CDCl3
NS       2048
DS       4
SWH      18028.846 Hz
FIDRES   0.275098 Hz
AQ       1.8175818 sec
RG       512
DW       27.733 usec
DE       6.50 usec
TE       293.2 K
D1       2.00000000 sec
D11     0.03000000 sec
TD0      1
    
```

```

===== CHANNEL f1 =====
NUC1      13C
P1        9.25 usec
PL1       0.00 dB
PL1W      25.82219315 W
SFO1     75.4752953 MHz
    
```

```

===== CHANNEL f2 =====
CPDPRG2  waltz16
NUC2      1H
PCPD2    80.00 usec
PL2       0.00 dB
PL12     17.23 dB
PL13     18.00 dB
PL2W      11.02718163 W
PL12W    0.20867218 W
PL13W    0.17476904 W
SFO2     300.1312005 MHz
SI        32768
SF        75.4677490 MHz
WDW       EM
SSB       0
LB        1.00 Hz
GB        0
PC        1.40
    
```

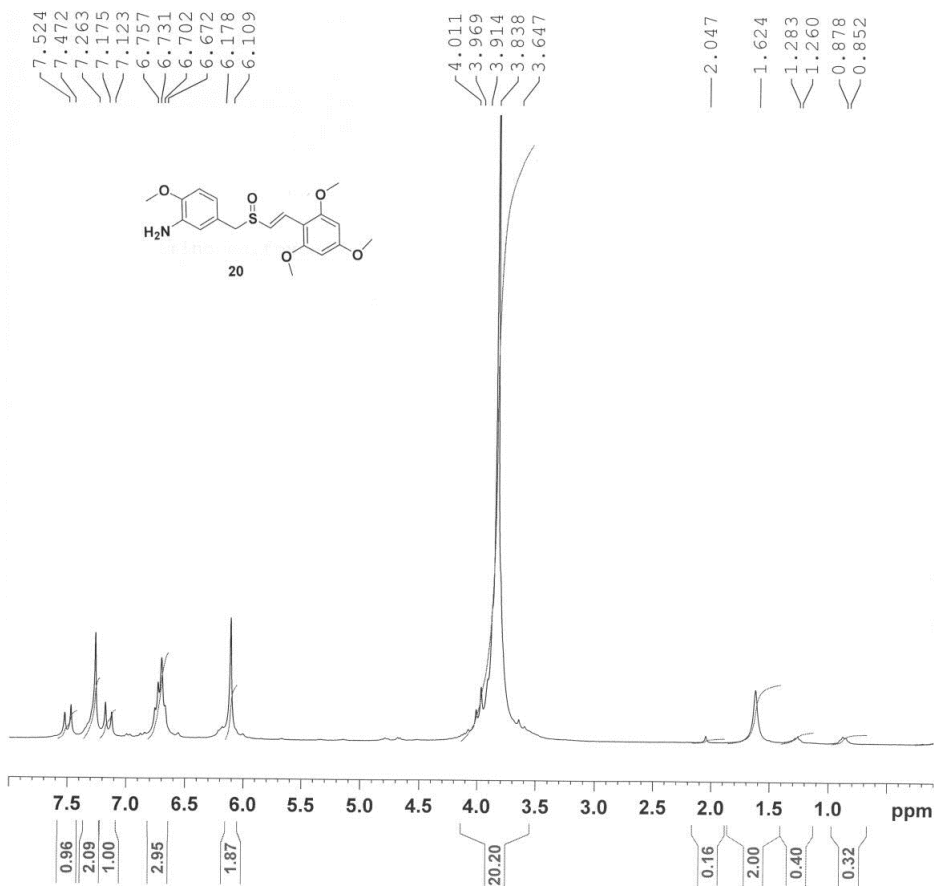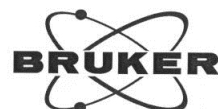

```

NAME      venkat
EXPNO     1490
PROCNO    1
Date_     20120829
Time      15.56
INSTRUM   spect
PROBHD    5 mm PABBO BB-
PULPROG   zg30
TD         65536
SOLVENT   CDCl3
NS         128
DS         0
SWH        6188.119 Hz
FIDRES     0.094423 Hz
AQ         5.2953587 sec
RG         362
DW         80.800 usec
DE         6.50 usec
TE         292.4 K
D1         2.00000000 sec
D11        0
D10        1
    
```

```

===== CHANNEL f1 =====
NUC1      1H
P1        11.00 usec
PL1       0.00 dB
PL1W      11.02718163 W
SFO1      300.1318534 MHz
SI        32768
SF         300.1300061 MHz
WDW       EM
SSB       0
LB        0.30 Hz
GB        0
PC        1.00
    
```

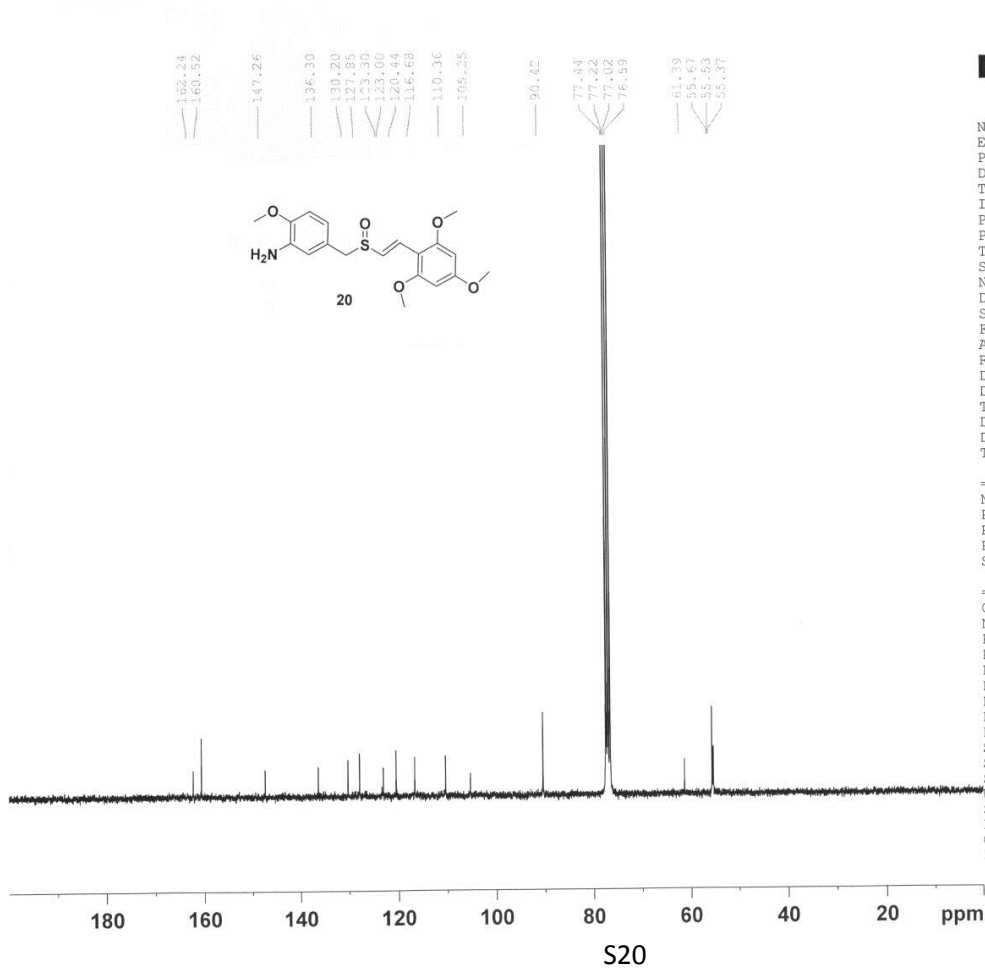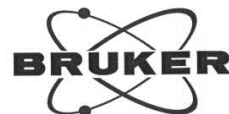

```

NAME      venkat
EXPNO     1500
PROCNO    1
Date_     20120830
Time      4.27
INSTRUM   spect
PROBHD    5 mm PABBO BB-
PULPROG   zgpg30
TD         65536
SOLVENT   CDCl3
NS         10240
DS         4
SWH        18028.846 Hz
FIDRES     0.275098 Hz
AQ         1.8175818 sec
RG         512
DW         27.733 usec
DE         6.50 usec
TE         293.7 K
D1         2.00000000 sec
D11        0.03000000 sec
D10        1
    
```

```

===== CHANNEL f1 =====
NUC1      13C
P1        9.25 usec
PL1       0.00 dB
PL1W      25.82219315 W
SFO1      75.4752953 MHz
    
```

```

===== CHANNEL f2 =====
CPDPRG2   waltz16
NUC2      1H
PCPD2     80.00 usec
PL2       0.00 dB
PL12      17.23 dB
PL13      18.00 dB
PL2W      11.02718163 W
PL12W     0.20867218 W
PL13W     0.17476904 W
SFO2      300.1312005 MHz
SI        32768
SF         75.4677490 MHz
WDW       EM
SSB       0
LB        1.00 Hz
GB        0
PC        1.40
    
```



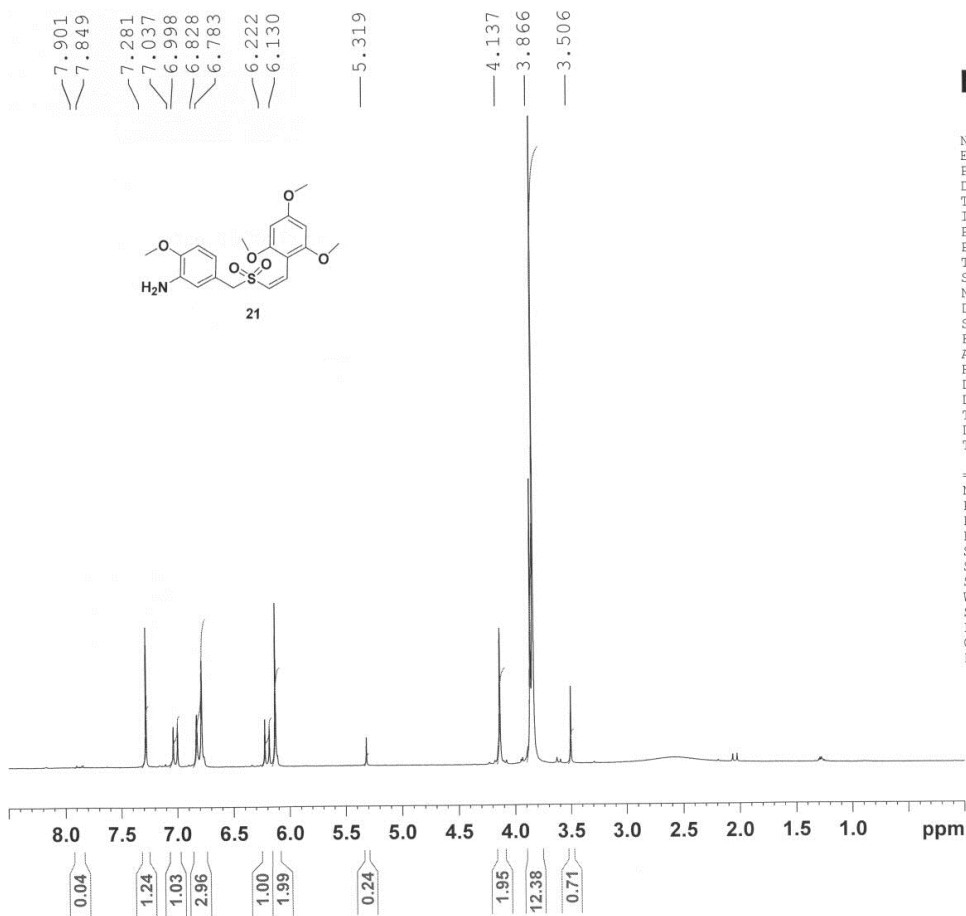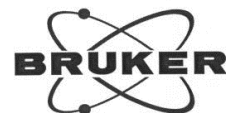

```

NAME      murali
EXPNO     3330
PROCNO    1
Date_     20110810
Time_     15.57
INSTRUM   spect
PROBHD    5 mm PABBO BB-
PULPROG   zg30
TD         65536
SOLVENT   CDCl3
NS         16
DS         2
SWH        6188.119 Hz
FIDRES     0.094423 Hz
AQ         5.2953587 sec
RG         406
DW         80.800 usec
DE         6.50 usec
TE         290.6 K
D1         1.0000000 sec
TD0        1
    
```

```

===== CHANNEL f1 =====
NUC1      1H
P1        11.00 usec
PL1       0.00 dB
PL1W      11.02718163 W
SFO1      300.1318534 MHz
SI        32768
SF        300.1300000 MHz
WDW       EM
SSB       0
LB        0.30 Hz
GB        0
PC        1.00
    
```

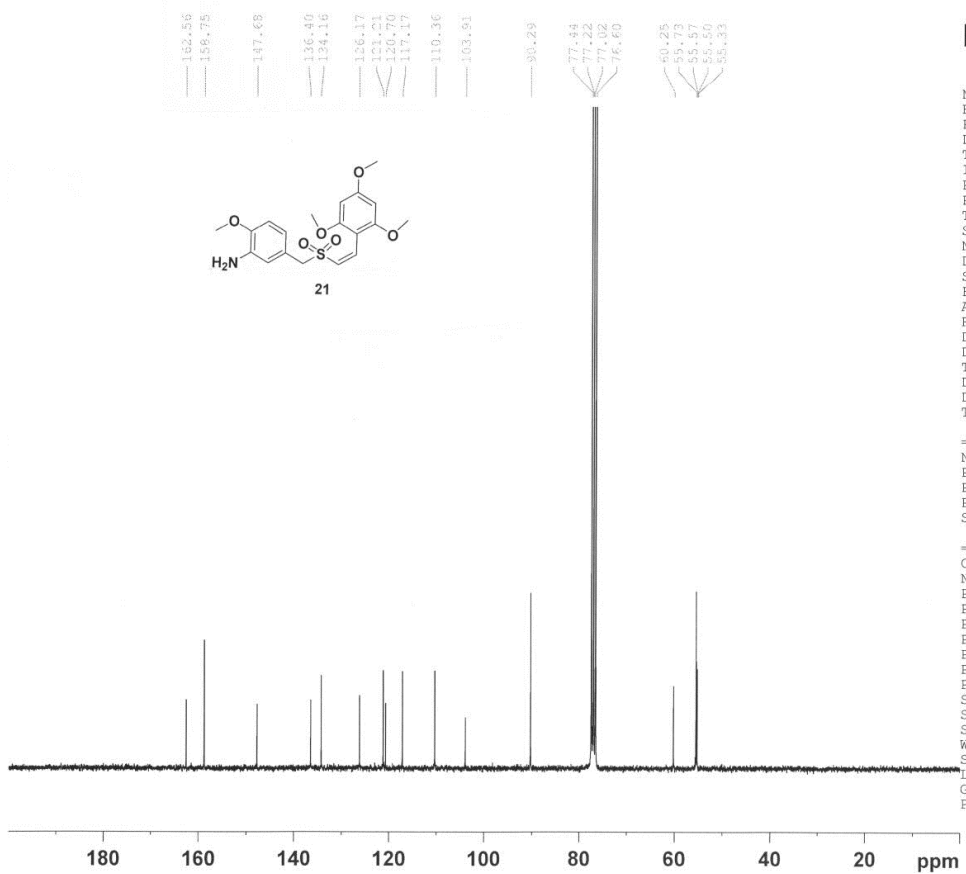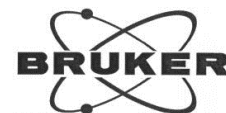

```

NAME      venkat
EXPNO     1090
PROCNO    1
Date_     20120725
Time_     3.59
INSTRUM   spect
PROBHD    5 mm PABBO BB-
PULPROG   zgpg30
TD         65536
SOLVENT   CDCl3
NS         10240
DS         4
SWH        18028.846 Hz
FIDRES     0.275098 Hz
AQ         1.8175818 sec
RG         456
DW         27.733 usec
DE         6.50 usec
TE         293.8 K
D1         2.0000000 sec
D11        0.03000000 sec
TD0        1
    
```

```

===== CHANNEL f1 =====
NUC1      13C
P1        9.25 usec
PL1       0.00 dB
PL1W      25.82219315 W
SFO1      75.4752953 MHz
    
```

```

===== CHANNEL f2 =====
CPDPRG2   waltz16
NUC2      1H
PCPD2     80.00 usec
PL2       0.00 dB
PL12      17.23 dB
PL13      18.00 dB
PL2W      11.02718163 W
PL12W     0.20867218 W
PL13W     0.17476904 W
SFO2      300.1312005 MHz
SI        32768
SF        75.4677490 MHz
WDW       EM
SSB       0
LB        1.00 Hz
GB        0
PC        1.40
    
```

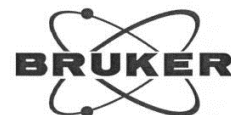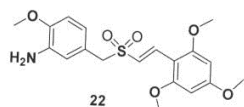

```

NAME      murali
EXPNO    544
PROCNO   1
Date_    20090520
Time     16.01
INSTRUM  spect
PROBHD   5 mm PABBO BB-
PULPROG  zg30
TD       65536
SOLVENT  CDCl3
NS       16
DS       2
SWH      6188.119 Hz
FIDRES   0.094423 Hz
AQ       5.2953587 sec
RG       128
DW       80.800 usec
DE       6.50 usec
TE       292.4 K
D1       1.0000000 sec
TD0      1
    
```

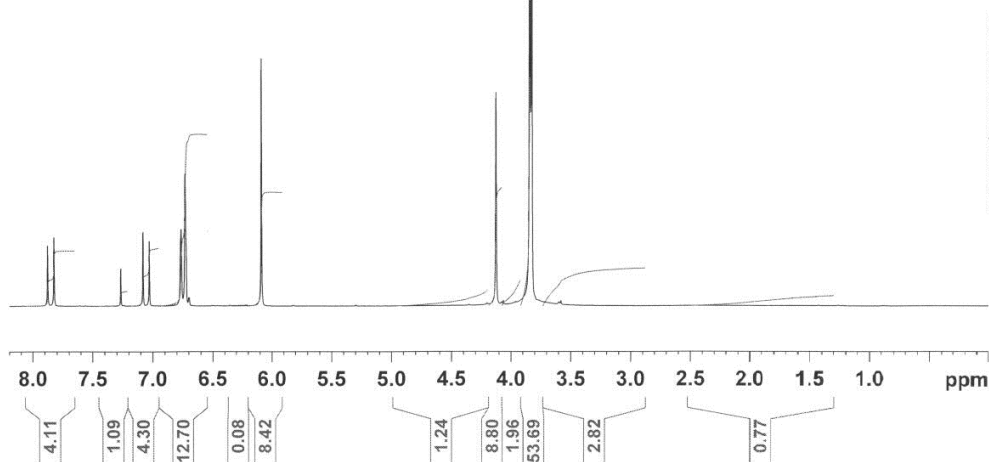

```

===== CHANNEL f1 =====
NUC1     1H
P1       11.00 usec
PL1      0.00 dB
PL1W     11.02718163 W
SFO1     300.1318534 MHz
SI       32768
SF       300.1300000 MHz
WDW      EM
SSB      0
LB       0.30 Hz
GB       0
PC       1.00
    
```

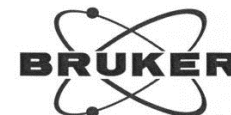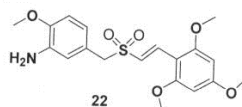

```

NAME      murali
EXPNO    547
PROCNO   1
Date_    20090520
Time     17.51
INSTRUM  spect
PROBHD   5 mm PABBO BB-
PULPROG  zgpg30
TD       65536
SOLVENT  CDCl3
NS       1024
DS       4
SWH      18028.846 Hz
FIDRES   0.275098 Hz
AQ       1.8175818 sec
RG       1440
DW       27.733 usec
DE       6.50 usec
TE       293.2 K
D1       2.0000000 sec
D11      0.0300000 sec
TD0      1
    
```

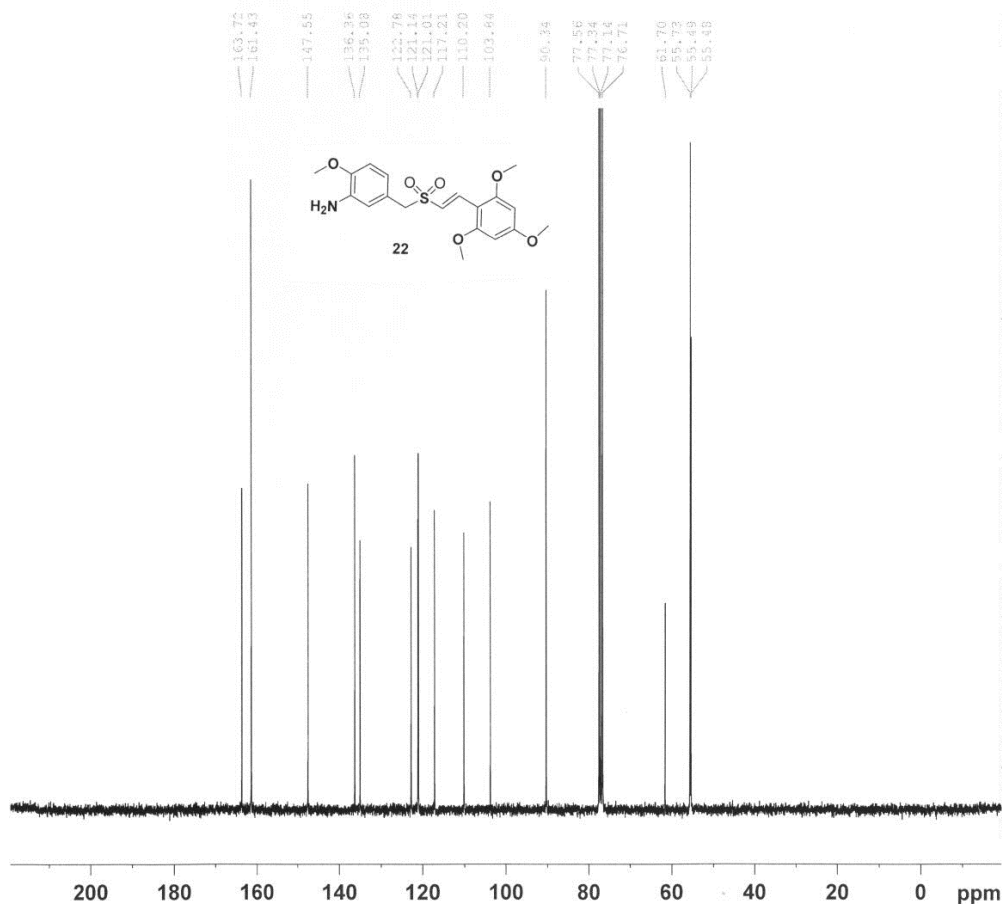

```

===== CHANNEL f1 =====
NUC1     13C
P1       9.25 usec
PL1      0.00 dB
PL1W     25.82219315 W
SFO1     75.4752953 MHz

===== CHANNEL f2 =====
CPDPRG2  waltz16
NUC2     1H
PCPD2    80.00 usec
PL2      0.00 dB
PL12     17.23 dB
PL13     120.00 dB
PL2W     11.02718163 W
PL12W    0.20867218 W
PL13W    0.00000000 W
SFO2     300.1312005 MHz
SI       32768
SF       75.4677490 MHz
WDW      EM
SSB      0
LB       1.00 Hz
GB       0
PC       1.40
    
```

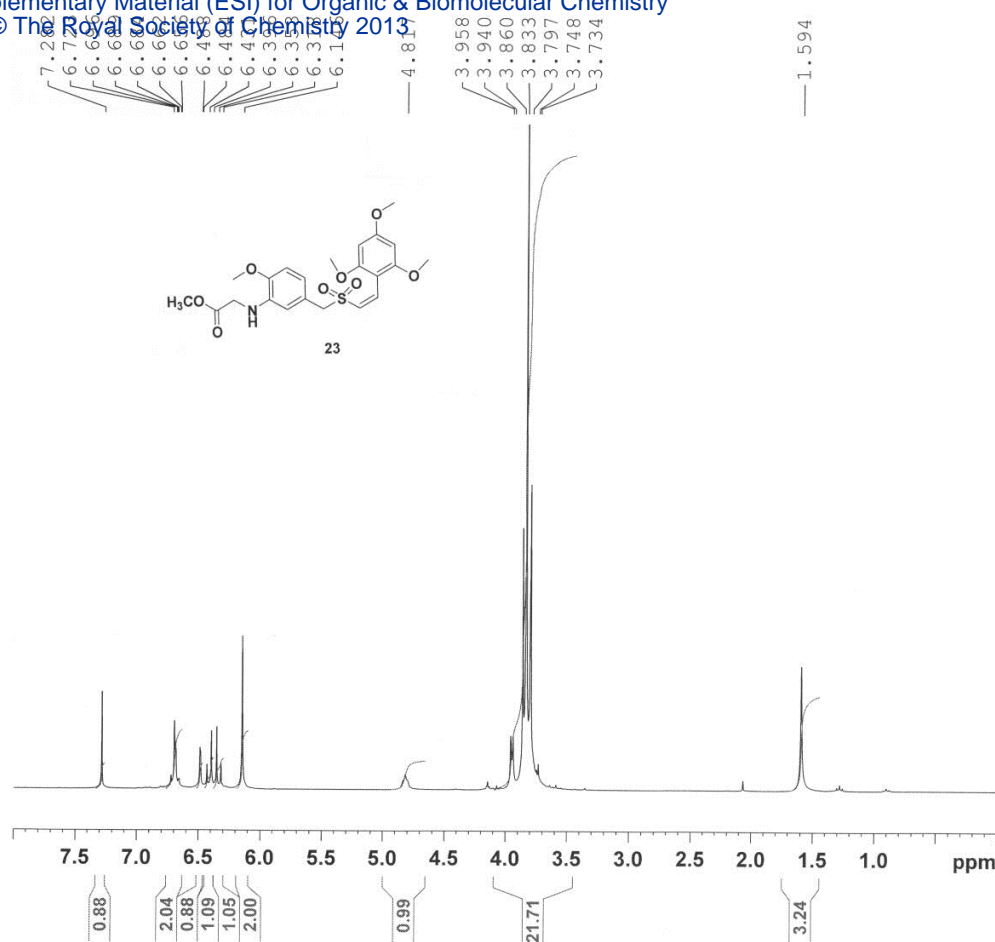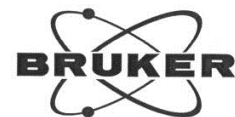

```

NAME      venkat
EXPNO     1060
PROCNO    1
Date_     20120724
Time      12.03
INSTRUM   spect
PROBHD    5 mm PABBO BB-
PULPROG   zg30
TD         65536
SOLVENT   CDC13
NS         128
DS         0
SWH        6188.119 Hz
FIDRES     0.094423 Hz
AQ         5.2953587 sec
RG         362
DW         80.800 usec
DE         6.50 usec
TE         292.9 K
D1         2.0000000 sec
D11        1
TD0        1
    
```

```

===== CHANNEL f1 =====
NUC1      1H
P1         11.00 usec
PL1        0.00 dB
PL1W       11.02718163 W
SF01      300.1318534 MHz
SI         32768
SF         300.1300000 MHz
WDW        EM
SSB        0
LB         0.30 Hz
GB         0
PC         1.00
    
```

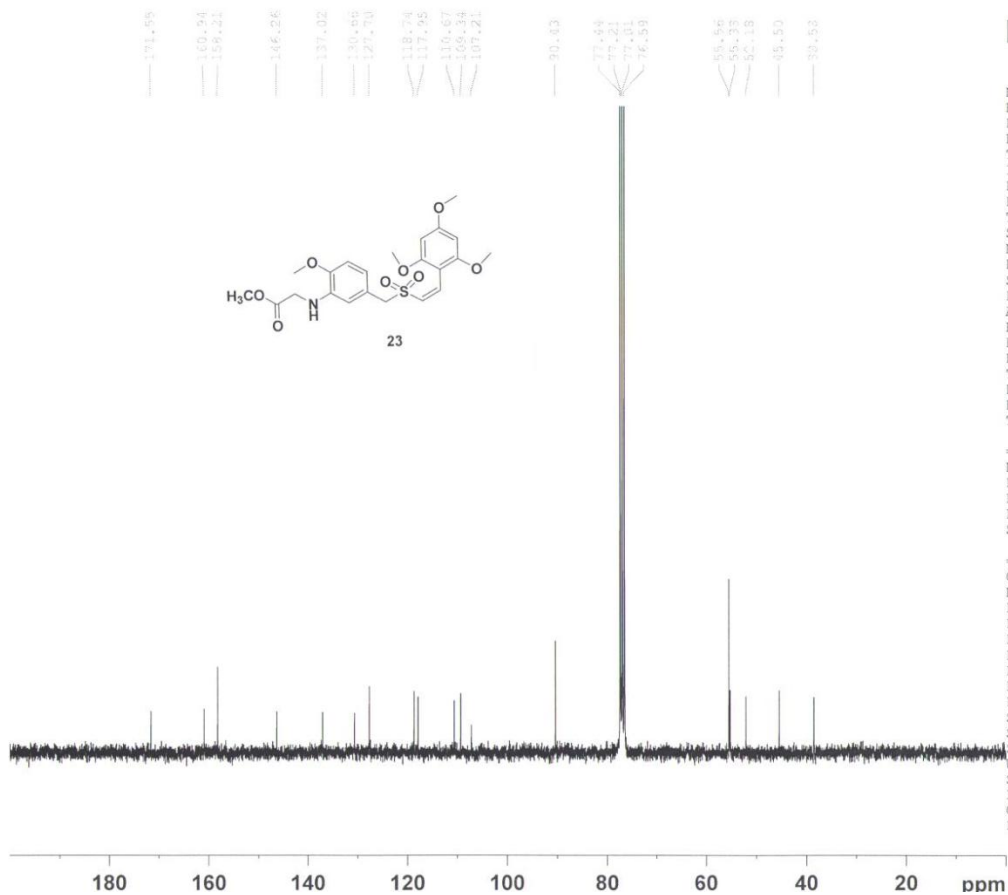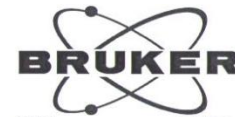

```

NAME      venkat
EXPNO     1050
PROCNO    1
Date_     20120724
Time      11.42
INSTRUM   spect
PROBHD    5 mm PABBO BB-
PULPROG   zgpg30
TD         65536
SOLVENT   CDC13
NS         2048
DS         4
SWH        18028.846 Hz
FIDRES     0.275098 Hz
AQ         1.8175818 sec
RG         456
DW         27.733 usec
DE         6.50 usec
TE         293.8 K
D1         2.0000000 sec
D11        0.03000000 sec
TD0        1
    
```

```

===== CHANNEL f1 =====
NUC1      13C
P1         9.25 usec
PL1        0.00 dB
PL1W       25.82219315 W
SF01      75.4752953 MHz
    
```

```

===== CHANNEL f2 =====
CPDPRG2   waltz16
NUC2      1H
PCPD2     80.00 usec
PL2        0.00 dB
PL12       17.23 dB
PL13       18.00 dB
PL2W       11.02718163 W
PL12W      0.20867218 W
PL13W      0.17476904 W
SF02      300.1312005 MHz
SI         32768
SF         75.4677490 MHz
WDW        EM
SSB        0
LB         1.00 Hz
GB         0
PC         1.40
    
```

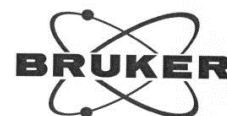

NAME murali  
 EXPNO 551  
 PROCNO 1  
 Date\_ 20090521  
 Time\_ 15.01  
 INSTRUM spect  
 PROBHD 5 mm PABBO BB-  
 PULPROG zg30  
 TD 65536  
 SOLVENT CDCl3  
 NS 16  
 DS 2  
 SWH 6188.119 Hz  
 FIDRES 0.094423 Hz  
 AQ 5.2953587 sec  
 RG 287  
 DW 80.800 usec  
 DE 6.50 usec  
 TE 293.2 K  
 D1 1.00000000 sec  
 TD0 1

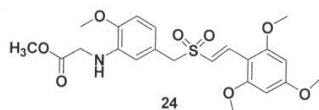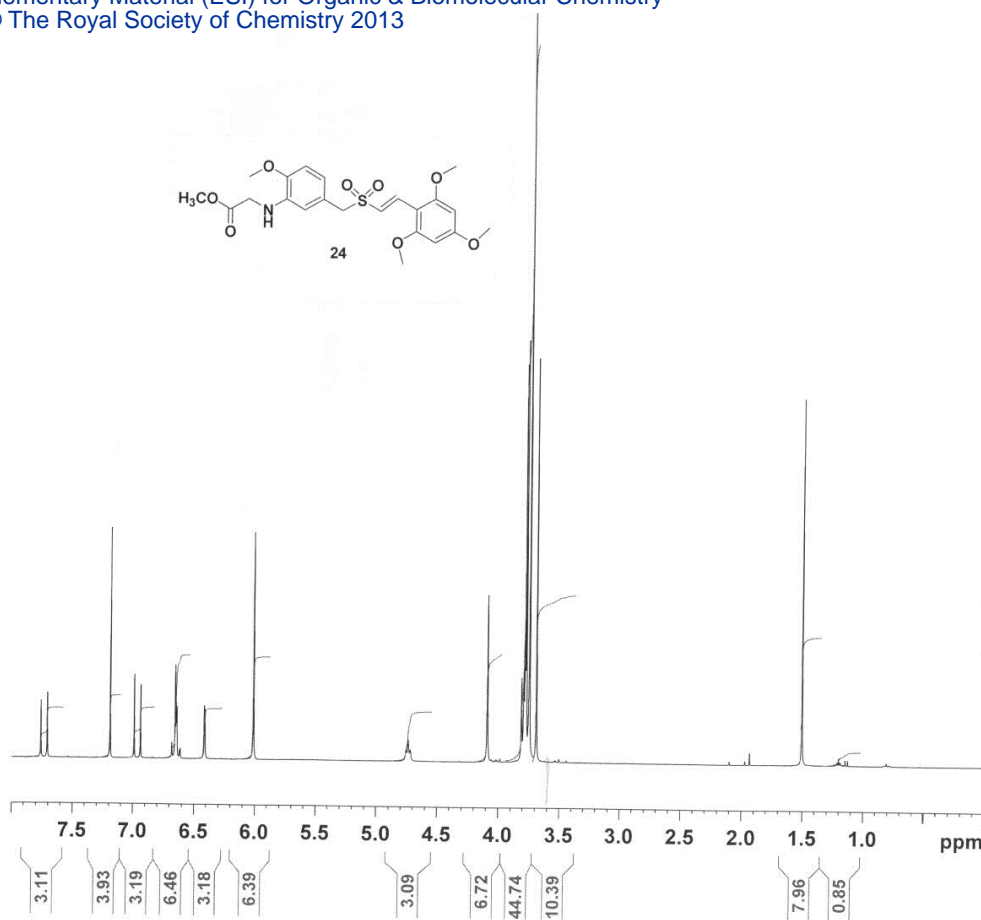

===== CHANNEL f1 =====  
 NUC1 1H  
 P1 11.00 usec  
 PL1 0.00 dB  
 PL1W 11.02718163 W  
 SFO1 300.1318534 MHz  
 SI 32768  
 SF 300.1300228 MHz  
 WDW EM  
 SSB 0  
 LB 0.30 Hz  
 GB 0  
 PC 1.00

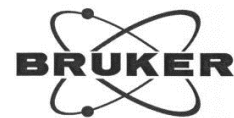

NAME venkat  
 EXPNO 1030  
 PROCNO 1  
 Date\_ 20120723  
 Time\_ 16.30  
 INSTRUM spect  
 PROBHD 5 mm PABBO BB-  
 PULPROG zgpg30  
 TD 65536  
 SOLVENT CDCl3  
 NS 1024  
 DS 4  
 SWH 18028.846 Hz  
 FIDRES 0.275098 Hz  
 AQ 1.8175818 sec  
 RG 575  
 DW 27.733 usec  
 DE 6.50 usec  
 TE 293.7 K  
 D1 2.00000000 sec  
 D11 0.03000000 sec  
 TD0 1

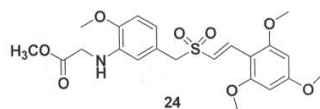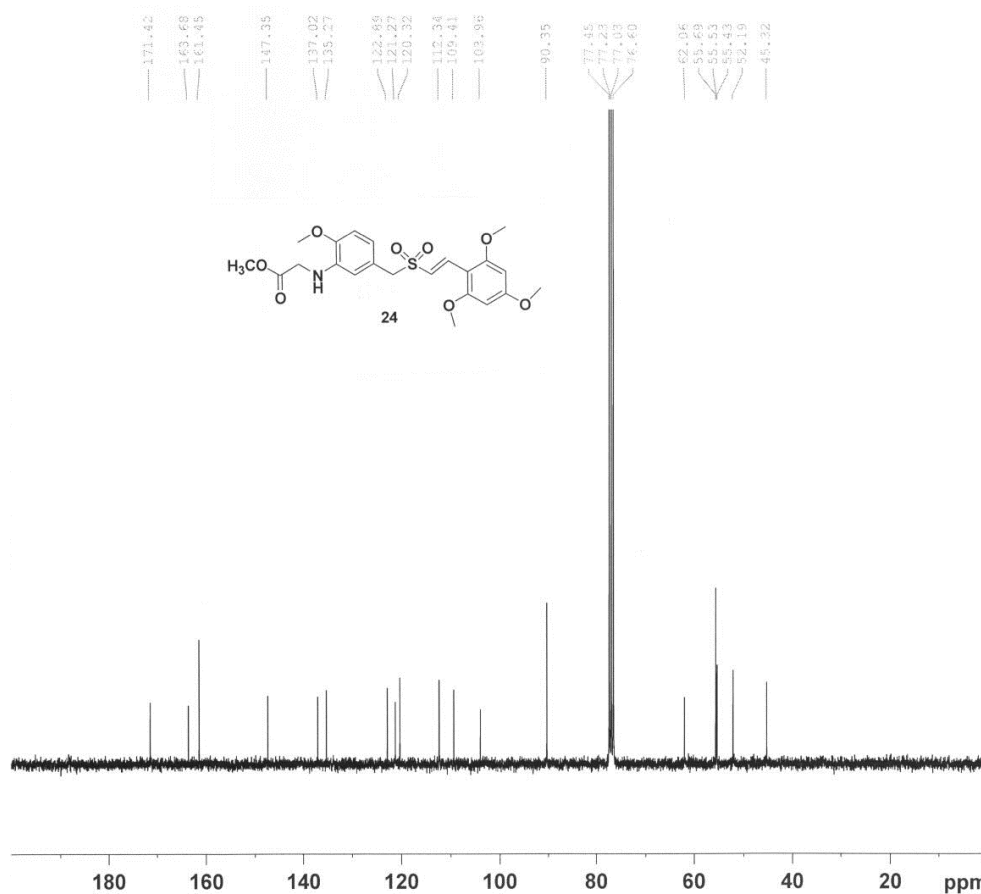

===== CHANNEL f1 =====  
 NUC1 13C  
 P1 9.25 usec  
 PL1 0.00 dB  
 PL1W 25.82219315 W  
 SFO1 75.4752953 MHz

===== CHANNEL f2 =====  
 CPDPRG2 waltz16  
 NUC2 1H  
 PCPD2 80.00 usec  
 PL2 0.00 dB  
 PL12 17.23 dB  
 PL13 18.00 dB  
 PL2W 11.02718163 W  
 PL12W 0.20867218 W  
 PL13W 0.17476904 W  
 SFO2 300.1312005 MHz  
 SI 32768  
 SF 75.4677490 MHz  
 WDW EM  
 SSB 0  
 LB 1.00 Hz  
 GB 0  
 PC 1.40

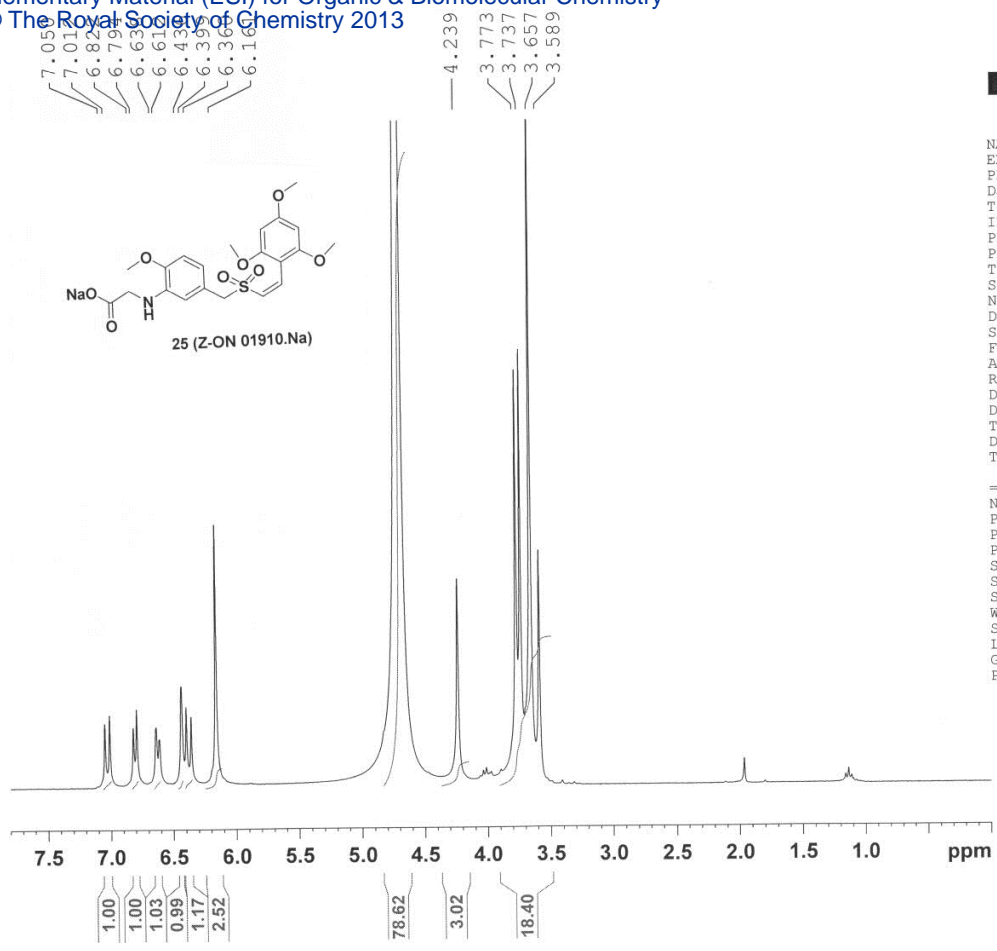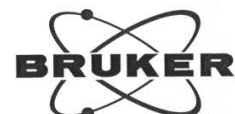

```

NAME      murali
EXPNO     4000
PROCNO    1
Date_     20110912
Time      11.38
INSTRUM   spect
PROBHD    5 mm PABBO BB-
PULPROG   zg30
TD         65536
SOLVENT   D2O
NS         128
DS         0
SWH        6188.119 Hz
FIDRES     0.094423 Hz
AQ         5.2953587 sec
RG         144
DW         80.800 usec
DE         6.50 usec
TE         292.6 K
D1         2.00000000 sec
TDO        1
    
```

```

===== CHANNEL f1 =====
NUC1      1H
P1        11.00 usec
PL1       0.00 dB
PL1W      11.02718163 W
SF01      300.1318534 MHz
SI        32768
SF        300.1300000 MHz
WDW       EM
SSB       0
LB        0.30 Hz
GB        0
PC        1.00
    
```

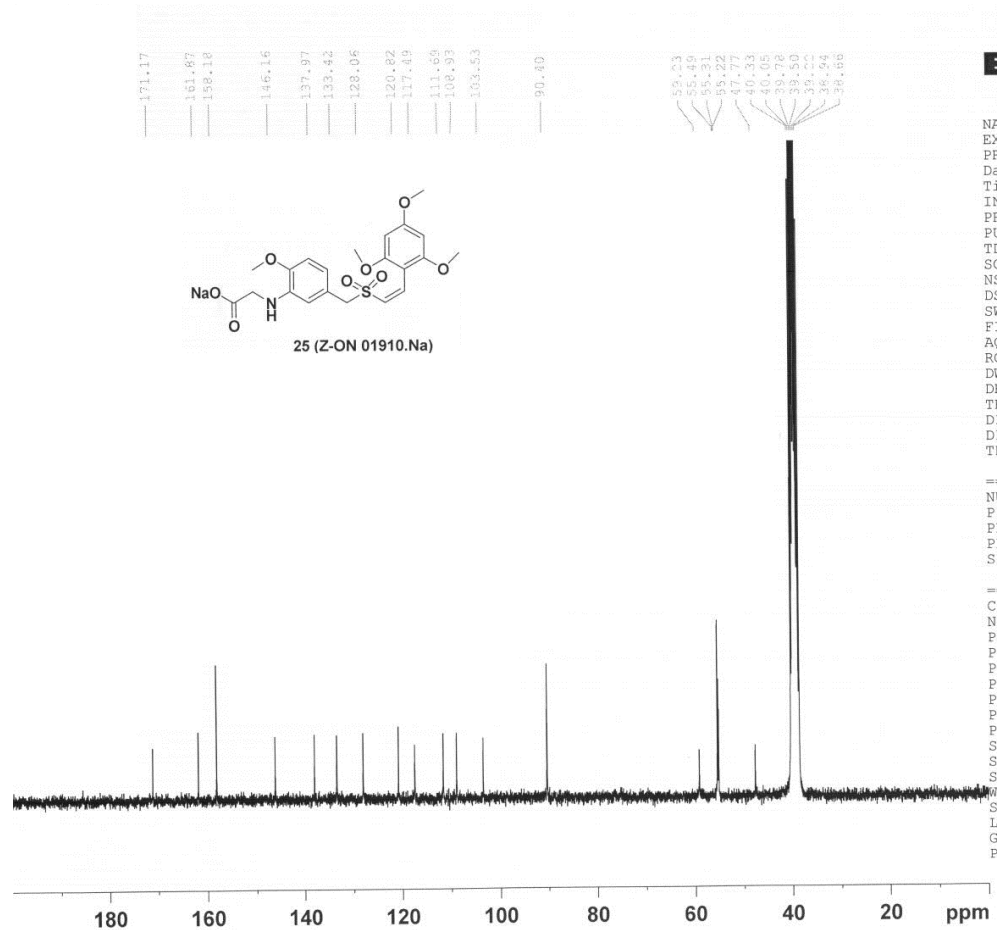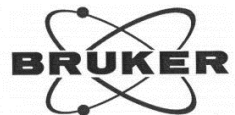

```

NAME      venkat
EXPNO     1200
PROCNO    1
Date_     20120731
Time      6.52
INSTRUM   spect
PROBHD    5 mm PABBO BB-
PULPROG   zgpg30
TD         65536
SOLVENT   DMSO
NS         13000
DS         4
SWH        18028.846 Hz
FIDRES     0.275098 Hz
AQ         1.8175818 sec
RG         575
DW         27.733 usec
DE         6.50 usec
TE         293.9 K
D1         2.00000000 sec
D11        0.03000000 sec
TDO        1
    
```

```

===== CHANNEL f1 =====
NUC1      13C
P1        9.25 usec
PL1       0.00 dB
PL1W      25.82219315 W
SF01      75.4752953 MHz
    
```

```

===== CHANNEL f2 =====
CPDPRG2   waltz16
NUC2      1H
PCPD2     80.00 usec
PL2       0.00 dB
PL12      17.23 dB
PL13      18.00 dB
PL2W      11.02718163 W
PL12W     0.20867218 W
PL13W     0.17476904 W
SFO2      300.1312005 MHz
SI        32768
SF        75.4677867 MHz
WDW       EM
SSB       0
LB        1.00 Hz
GB        0
PC        1.40
    
```



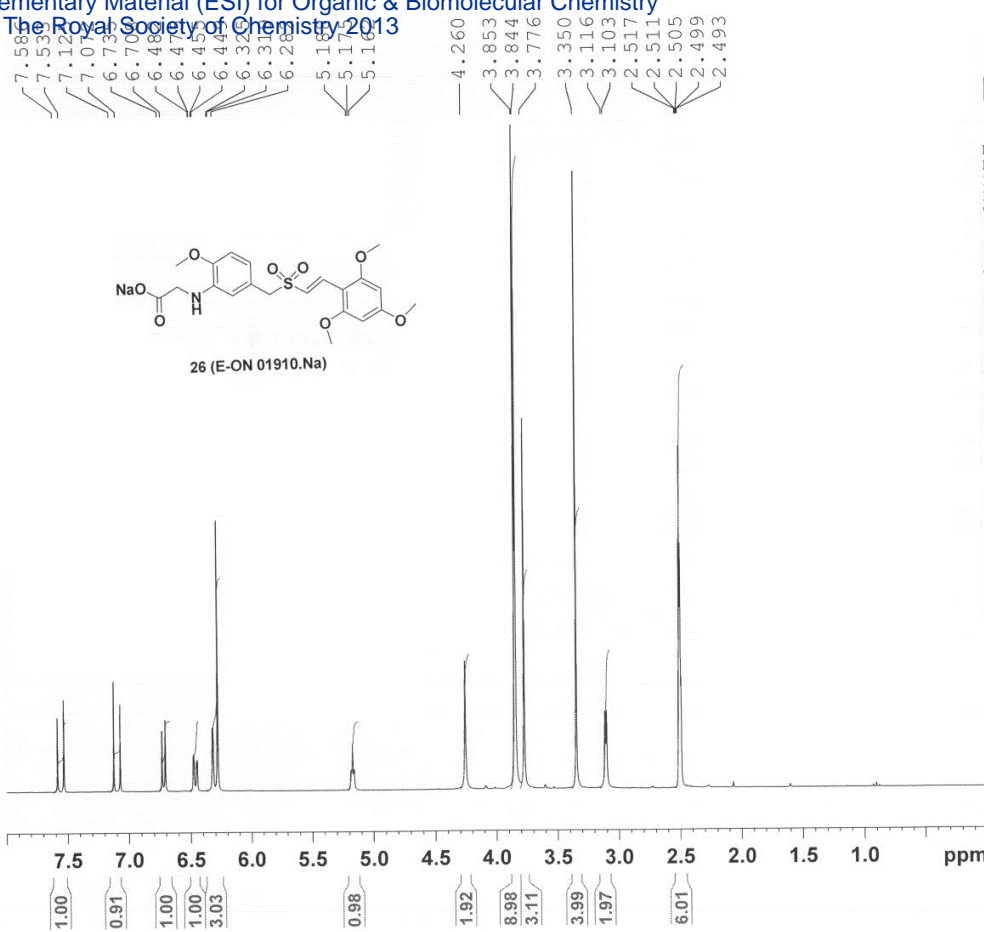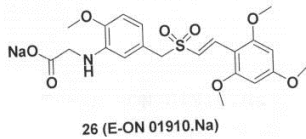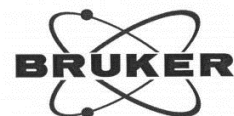

```

NAME      murali
EXPNO    3560
PROCNO   1
Date_    20110830
Time     15.23
INSTRUM  spect
PROBHD   5 mm PABBO BB-
PULPROG  zg30
TD       65536
SOLVENT  DMSO
NS       16
DS       2
SWH      6188.119 Hz
FIDRES   0.094423 Hz
AQ       5.2953587 sec
RG       256
DW       80.800 usec
DE       6.50 usec
TE       291.5 K
D1       1.00000000 sec
TD0      1
    
```

```

===== CHANNEL f1 =====
NUC1     1H
P1       11.00 usec
PL1      0.00 dB
PL1W     11.02718163 W
SF01     300.1318534 MHz
SI       32768
SF       300.1300000 MHz
WDW      EM
SSB      0
LB       0.30 Hz
GB       0
PC       1.00
    
```

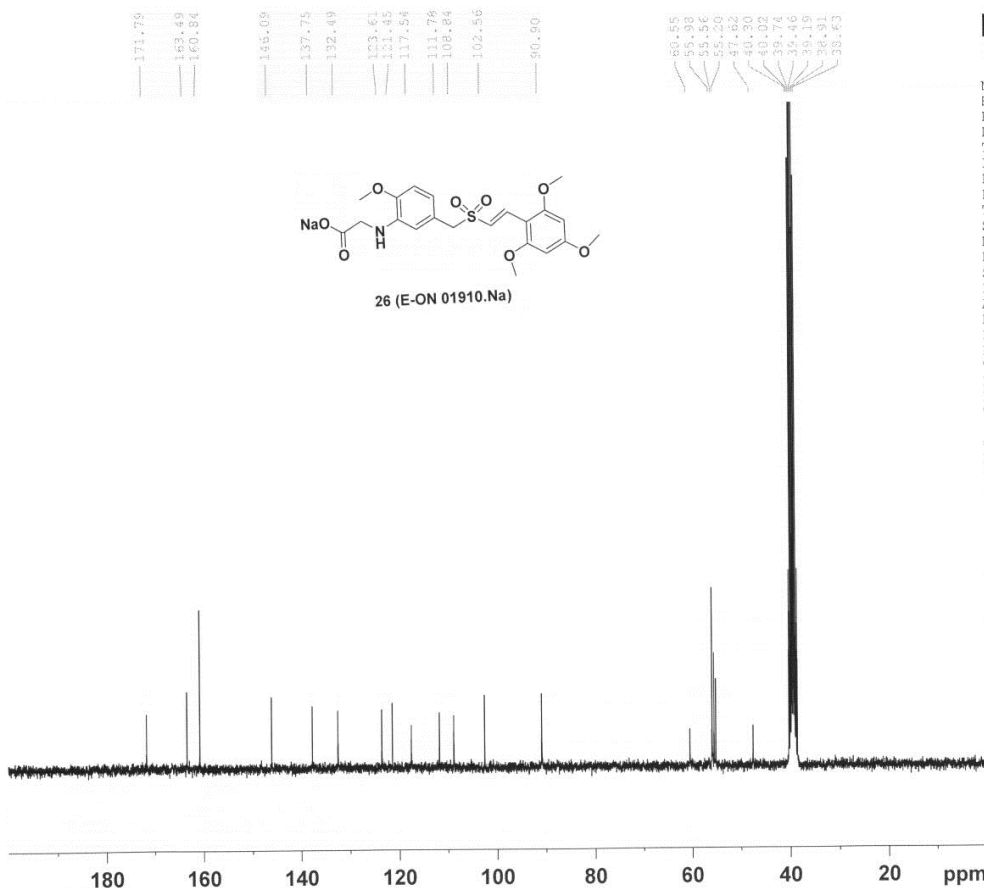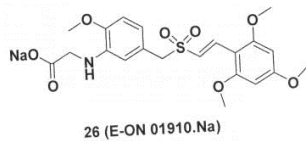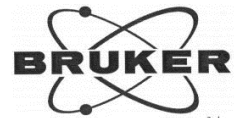

```

NAME      murali
EXPNO    5990
PROCNO   1
Date_    20120904
Time     12.18
INSTRUM  spect
PROBHD   5 mm PABBO BB-
PULPROG  zgpg30
TD       65536
SOLVENT  DMSO
NS       1024
DS       4
SWH      18028.846 Hz
FIDRES   0.275098 Hz
AQ       1.8175818 sec
RG       724
DW       27.733 usec
DE       6.50 usec
TE       292.9 K
D1       2.00000000 sec
D11      0.03000000 sec
TD0      1
    
```

```

===== CHANNEL f1 =====
NUC1     13C
P1       9.25 usec
PL1      0.00 dB
PL1W     25.82219315 W
SF01     75.4752953 MHz
    
```

```

===== CHANNEL f2 =====
CPDPRG2  waltz16
NUC2     1H
PCPD2    80.00 usec
PL2      0.00 dB
PL12     17.23 dB
PL13     18.00 dB
PL1W     11.02718163 W
FL12W    0.20867218 W
FL13W    0.17476904 W
SF02     300.1312005 MHz
SI       32768
SF       75.4677867 MHz
WDW      EM
SSB      0
LB       1.00 Hz
GB       0
PC       1.40
    
```
